# Supplementary material for: Gut Microbiota Patterns Predicting Long-Term Weight Loss Success in Individuals with Obesity Undergoing Nonsurgical Therapy
Source: MDPI journal article supplement (doi:10.3390/nu14153182), 2022-08-03
Supplement: s1 [file s1]

## Supplementary Tables S1-S6

Supplement to: Gut microbiota patterns predicting long-term weight loss success in individuals with obesity undergoing non-surgical therapy

Stephan C. Bischoff<sup>1\*</sup>, Nguyen K. Nguyen<sup>2</sup>, Benjamin Seethaler<sup>1</sup>, Julia Beisner<sup>1</sup>, Philipp Kügler<sup>3</sup>, Thorsten Stefan<sup>3</sup>

<sup>1</sup>Institute of Nutritional Medicine, University of Hohenheim, Stuttgart

<sup>2</sup>Microbiome Insights Inc, Vancouver, Canada

<sup>3</sup>Institute of Applied Mathematics and Statistics & Computational Science Lab, University

of Hohenheim, Stuttgart Corresponding author:

Stephan C. Bischoff, M.D., Professor of Medicine and Clinical Nutrition, Department of Nutritional Medicine, University of Hohenheim, 70593 Stuttgart, Germany, Phone +49 711 459 24101, Email [bischoff.stephan@uni-hohenheim.de](mailto:bischoff.stephan@uni-hohenheim.de)

**Supplementary Table S1A**

**Correlations between each predictor variable from the set of genera and both delta BMI (column D) and RWL (column E). The mean correlation of both measures of weight loss can be found in column F. Scores were awarded for the strongest positive and negative correlations, with a mean correlation of  $r \geq 60\%$  corresponding to a score of 2,  $55\% \leq r < 60\%$  corresponding to a score of 1.5,  $50\% \leq r < 55\%$  corresponding to a score of 1,  $45\% \leq r < 50\%$  corresponding to a score of 0.5, and the same scores being awarded to strongly negative correlations accordingly.**

| Genus                                      | Correlations<br>(deltaBMI) | Correlations<br>(RWL) | Correlations<br>(mean) | Score |
|--------------------------------------------|----------------------------|-----------------------|------------------------|-------|
| Alistipes                                  | 56,33%                     | 57,90%                | 57,11%                 | 1,5   |
| Symbiobacterium                            | 50,57%                     | 58,81%                | 54,69%                 | 1,5   |
| Akkermansia                                | 53,68%                     | 55,59%                | 54,63%                 | 1,5   |
| Gordonibacter                              | 48,14%                     | 48,31%                | 48,22%                 | 0,5   |
| Ethanoligenens                             | 42,78%                     | 52,59%                | 47,69%                 | 0,5   |
| Eggerthella                                | 47,23%                     | 46,65%                | 46,94%                 | 0,5   |
| Pseudoflavonifractor                       | 43,46%                     | 48,71%                | 46,09%                 | 0,5   |
| Oscillibacter                              | 39,43%                     | 48,06%                | 43,75%                 | 0     |
| Mycobacterium                              | 35,56%                     | 45,92%                | 40,74%                 | 0     |
| Parasutterella                             | 41,89%                     | 39,38%                | 40,64%                 | 0     |
| unclassified_Ruminococcaceae               | 38,23%                     | 41,76%                | 40,00%                 | 0     |
| Corynebacterium                            | 34,81%                     | 43,87%                | 39,34%                 | 0     |
| unclassified_Burkholderiales_miscellaneous | 40,42%                     | 36,78%                | 38,60%                 | 0     |
| Slackia                                    | 33,76%                     | 41,99%                | 37,88%                 | 0     |
| Deinococcus                                | 32,26%                     | 43,46%                | 37,86%                 | 0     |
| Heliobacterium                             | 31,45%                     | 41,97%                | 36,71%                 | 0     |
| Fretibacterium                             | 29,27%                     | 39,07%                | 34,17%                 | 0     |
| Sphaerochaeta                              | 29,73%                     | 38,16%                | 33,95%                 | 0     |
| Treponema                                  | 28,82%                     | 38,88%                | 33,85%                 | 0     |
| Streptomyces                               | 28,25%                     | 39,43%                | 33,84%                 | 0     |
| Enterococcus                               | 29,19%                     | 38,15%                | 33,67%                 | 0     |
| Desulfotomaculum                           | 28,44%                     | 37,72%                | 33,08%                 | 0     |
| Geobacter                                  | 27,32%                     | 38,35%                | 32,84%                 | 0     |
| Subdoligranulum                            | 30,82%                     | 33,71%                | 32,27%                 | 0     |
| Anaeromyxobacter                           | 26,03%                     | 37,06%                | 31,54%                 | 0     |
| environmental_samples_Bacteria             | 28,53%                     | 32,94%                | 30,74%                 | 0     |
| unclassified_sequences                     | 24,30%                     | 31,73%                | 28,02%                 | 0     |
| Paenibacillus                              | 22,62%                     | 32,93%                | 27,77%                 | 0     |
| Aeromonas                                  | 23,05%                     | 31,46%                | 27,26%                 | 0     |
| Klebsiella                                 | 20,50%                     | 33,76%                | 27,13%                 | 0     |
| Azospirillum                               | 20,70%                     | 32,67%                | 26,69%                 | 0     |
| Pseudomonas                                | 21,47%                     | 31,53%                | 26,50%                 | 0     |
| Geobacillus                                | 20,32%                     | 31,53%                | 25,93%                 | 0     |
| Anaerotruncus                              | 22,19%                     | 29,45%                | 25,82%                 | 0     |
| Syntrophobotulus                           | 22,15%                     | 28,73%                | 25,44%                 | 0     |
| Olsenella                                  | 22,47%                     | 27,57%                | 25,02%                 | 0     |
| Desulfitobacterium                         | 18,85%                     | 28,14%                | 23,49%                 | 0     |
| Spirochaeta                                | 17,94%                     | 28,81%                | 23,38%                 | 0     |
| Rhizobium                                  | 16,63%                     | 28,82%                | 22,73%                 | 0     |
| Selenomonas                                | 17,22%                     | 28,22%                | 22,72%                 | 0     |
| Escherichia                                | 19,27%                     | 25,89%                | 22,58%                 | 0     |
| Rhodospirillum                             | 15,10%                     | 26,78%                | 20,94%                 | 0     |
| Bradyrhizobium                             | 14,65%                     | 26,52%                | 20,59%                 | 0     |
| Bilophila                                  | 19,81%                     | 20,97%                | 20,39%                 | 0     |
| Lactobacillus                              | 12,69%                     | 23,53%                | 18,11%                 | 0     |
| Dorea                                      | 20,83%                     | 14,00%                | 17,41%                 | 0     |
| Odoribacter                                | 13,76%                     | 20,60%                | 17,18%                 | 0     |
| Butyrivibrio                               | 14,56%                     | 19,29%                | 16,93%                 | 0     |
| Ruminococcus                               | 13,72%                     | 19,44%                | 16,58%                 | 0     |
| Oribacterium                               | 12,86%                     | 19,35%                | 16,11%                 | 0     |
| Cellulosilyticum                           | 11,65%                     | 16,66%                | 14,15%                 | 0     |
| Propionibacterium                          | 7,83%                      | 19,52%                | 13,67%                 | 0     |
| Bacillus                                   | 8,14%                      | 17,78%                | 12,96%                 | 0     |
| Coriobacterium                             | 10,90%                     | 13,89%                | 12,40%                 | 0     |
| Enterobacter                               | 9,45%                      | 14,34%                | 11,90%                 | 0     |
| Tannerella                                 | 12,29%                     | 11,07%                | 11,68%                 | 0     |
| Dialister                                  | 5,40%                      | 11,22%                | 8,31%                  | 0     |
| Acidaminococcus                            | 9,81%                      | 6,28%                 | 8,04%                  | 0     |
| Staphylococcus                             | 4,67%                      | 11,10%                | 7,89%                  | 0     |
| Veillonella                                | 6,64%                      | 8,09%                 | 7,37%                  | 0     |
| Bacteroides                                | 8,56%                      | 4,85%                 | 6,71%                  | 0     |
| Coprococcus                                | 2,09%                      | 9,96%                 | 6,03%                  | 0     |
| Barnesiella                                | 3,50%                      | 8,47%                 | 5,99%                  | 0     |
| Flavobacterium                             | 5,06%                      | 6,49%                 | 5,78%                  | 0     |
| Pedobacter                                 | 4,38%                      | 6,61%                 | 5,50%                  | 0     |
| Collinsella                                | 5,22%                      | 5,76%                 | 5,49%                  | 0     |
| Desulfovibrio                              | 1,79%                      | 4,43%                 | 3,11%                  | 0     |
| unclassified_Peptostreptococcaceae         | 0,27%                      | 3,76%                 | 2,02%                  | 0     |
| Faecalibacterium                           | -0,20%                     | 3,90%                 | 1,85%                  | 0     |

**Supplementary Table S1A (continued)**

|                                          |         |         |         |     |
|------------------------------------------|---------|---------|---------|-----|
| Marvinbryantia                           | -5,16%  | 3,92%   | -0,62%  | 0   |
| Clostridium                              | -4,15%  | 1,36%   | -1,40%  | 0   |
| Campylobacter                            | -5,12%  | -0,73%  | -2,93%  | 0   |
| Paludibacter                             | -6,54%  | -6,52%  | -6,53%  | 0   |
| Sutterella                               | -8,10%  | -5,73%  | -6,91%  | 0   |
| unclassified_Lachnospiraceae             | -8,91%  | -5,83%  | -7,37%  | 0   |
| Capnocytophaga                           | -10,11% | -5,27%  | -7,69%  | 0   |
| Holdemania                               | -9,29%  | -8,03%  | -8,66%  | 0   |
| Chitinophaga                             | -8,79%  | -9,12%  | -8,95%  | 0   |
| Dysgonomonas                             | -13,57% | -5,80%  | -9,68%  | 0   |
| Prevotella                               | -8,60%  | -12,66% | -10,63% | 0   |
| Sphingobacterium                         | -12,67% | -11,10% | -11,89% | 0   |
| unclassified_Erysipelotrichaceae         | -15,46% | -9,09%  | -12,27% | 0   |
| Paraprevotella                           | -15,48% | -10,20% | -12,84% | 0   |
| Cupriavidus                              | -15,78% | -10,99% | -13,38% | 0   |
| Bifidobacterium                          | -16,89% | -11,69% | -14,29% | 0   |
| Ralstonia                                | -16,99% | -12,65% | -14,82% | 0   |
| Acidovorax                               | -17,48% | -12,84% | -15,16% | 0   |
| Bordetella                               | -17,24% | -13,10% | -15,17% | 0   |
| Burkholderia                             | -20,09% | -15,00% | -17,55% | 0   |
| Bacteroides_pectinophilus                | -18,00% | -17,29% | -17,64% | 0   |
| Streptococcus                            | -21,96% | -13,64% | -17,80% | 0   |
| Porphyromonas                            | -21,16% | -19,42% | -20,29% | 0   |
| unclassified_Clostridiales_miscellaneous | -21,23% | -20,27% | -20,75% | 0   |
| Phascolarctobacterium                    | -17,65% | -23,87% | -20,76% | 0   |
| Roseburia                                | -21,72% | -23,21% | -22,47% | 0   |
| Eubacterium                              | -22,83% | -25,21% | -24,02% | 0   |
| Megamonas                                | -23,95% | -27,74% | -25,84% | 0   |
| Parabacteroides                          | -34,42% | -31,37% | -32,89% | 0   |
| Human_endogenous_retroviruses            | -37,95% | -32,05% | -35,00% | 0   |
| Blautia                                  | -36,74% | -33,95% | -35,35% | 0   |
| Megasphaera                              | -47,61% | -43,79% | -45,70% | 0,5 |
| Haemophilus                              | -51,44% | -50,62% | -51,03% | 1   |

Supplementary Table S1B

Correlations between each predictor variable from the set of species and both delta BMI (column D) and RWL (column E). The mean correlation of both measures of weight loss can be found in column F. Scores were awarded for the strongest positive and negative correlations, with a mean correlation of  $r \geq 60\%$  corresponding to a score of 2,  $55\% \leq r < 60\%$  corresponding to a score of 1.5,  $50\% \leq r < 55\%$  corresponding to a score of 1,  $45\% \leq r < 50\%$  corresponding to a score of 0.5, and the same scores being awarded to strongly negative correlations accordingly.

| Species                           | Correlations<br>(deltaBMI) | Correlations<br>(RWL) | Correlations<br>(mean) | Score |
|-----------------------------------|----------------------------|-----------------------|------------------------|-------|
| Alistipesfinegoldii               | 61,83%                     | 58,81%                | 60,32%                 | 2     |
| Akkermansiamuciniphila            | 53,94%                     | 55,88%                | 54,91%                 | 1,5   |
| Ethanoligenensharbinense          | 44,70%                     | 54,68%                | 49,69%                 | 1     |
| Gordonibacterpamelaeae            | 49,49%                     | 49,47%                | 49,48%                 | 0,5   |
| Pseudoflavonifractorcapillosus    | 45,27%                     | 50,56%                | 47,92%                 | 0,5   |
| Bacteroidesintestinalis           | 49,28%                     | 44,12%                | 46,70%                 | 0,5   |
| Oscillibactervalericigenes        | 41,10%                     | 49,97%                | 45,53%                 | 0,5   |
| Alistipesputredinis               | 44,49%                     | 44,40%                | 44,44%                 | 0     |
| Eggerthellalenta                  | 42,19%                     | 41,62%                | 41,90%                 | 0     |
| RuminococcaceabacteriumD16        | 40,00%                     | 43,28%                | 41,64%                 | 0     |
| Bacteroidescoprocola              | 43,33%                     | 38,52%                | 40,93%                 | 0     |
| Ruminococcuschampanellensis       | 32,02%                     | 43,20%                | 37,61%                 | 0     |
| Clostridiumleptum                 | 34,83%                     | 40,00%                | 37,41%                 | 0     |
| AlistipesspHGB5                   | 38,76%                     | 34,88%                | 36,82%                 | 0     |
| Subdoligranulumvariabile          | 32,71%                     | 35,57%                | 34,14%                 | 0     |
| Eubacteriumlimosum                | 27,86%                     | 36,62%                | 32,24%                 | 0     |
| unculturedorganism                | 25,91%                     | 33,43%                | 29,67%                 | 0     |
| Bacteroidesovatus                 | 29,05%                     | 29,24%                | 29,15%                 | 0     |
| Anaerotruncuscolihominis          | 23,30%                     | 30,68%                | 26,99%                 | 0     |
| Bacteroideseggerthii              | 25,26%                     | 28,60%                | 26,93%                 | 0     |
| Dorealongicatena                  | 28,79%                     | 20,05%                | 24,42%                 | 0     |
| Eubacteriumeligens                | 24,29%                     | 24,01%                | 24,15%                 | 0     |
| Alistipesshahii                   | 21,03%                     | 26,15%                | 23,59%                 | 0     |
| ClostridiumspSY8519               | 18,22%                     | 26,86%                | 22,54%                 | 0     |
| Ruminococcusalbus                 | 16,06%                     | 28,86%                | 22,46%                 | 0     |
| Escherichiacoli                   | 18,95%                     | 25,19%                | 22,07%                 | 0     |
| Bacteroidescoprophilus            | 23,75%                     | 19,70%                | 21,72%                 | 0     |
| Eubacteriumsiraeum                | 16,92%                     | 26,35%                | 21,64%                 | 0     |
| Bacteroidessp3133FAA              | 22,28%                     | 19,35%                | 20,82%                 | 0     |
| Butyrivibrioproteoclasticus       | 17,35%                     | 24,13%                | 20,74%                 | 0     |
| Lachnospiraceabacterium3157FAACT1 | 17,30%                     | 22,43%                | 19,86%                 | 0     |
| Bifidobacteriumadolescentis       | 15,74%                     | 22,61%                | 19,17%                 | 0     |
| Bilophilawadsworthia              | 18,09%                     | 19,10%                | 18,59%                 | 0     |
| Bacteroidesclarus                 | 19,37%                     | 17,18%                | 18,27%                 | 0     |
| Odoribactersplanchnicus           | 14,64%                     | 21,35%                | 18,00%                 | 0     |
| Ruminococcusbromii                | 15,02%                     | 18,90%                | 16,96%                 | 0     |
| Bacteroidessp224                  | 18,44%                     | 13,22%                | 15,83%                 | 0     |
| Desulfovibriovulgaris             | 13,17%                     | 17,45%                | 15,31%                 | 0     |
| _Eubacterium_cylindroides         | 10,99%                     | 19,45%                | 15,22%                 | 0     |
| Bacteroidessp9142FAA              | 16,67%                     | 12,82%                | 14,74%                 | 0     |
| Bacteroidesdorei                  | 16,39%                     | 12,48%                | 14,43%                 | 0     |
| Bacteroidesvulgatus               | 17,74%                     | 10,76%                | 14,25%                 | 0     |
| Bacteroidessp3140A                | 13,20%                     | 14,74%                | 13,97%                 | 0     |
| CoprococcusART55_1                | 8,82%                      | 17,43%                | 13,12%                 | 0     |
| Clostridiumhathewayi              | 7,43%                      | 13,96%                | 10,69%                 | 0     |
| Tannerellaforsythia               | 10,62%                     | 9,30%                 | 9,96%                  | 0     |
| Roseburiahominis                  | 10,16%                     | 8,86%                 | 9,51%                  | 0     |
| Acidaminococcusintestini          | 10,27%                     | 6,61%                 | 8,44%                  | 0     |
| RuminococcusSR1_5                 | 4,42%                      | 10,31%                | 7,37%                  | 0     |
| Bacteroidesfragilis               | 7,36%                      | 6,96%                 | 7,16%                  | 0     |
| Collinsellaerofaciens             | 6,74%                      | 6,80%                 | 6,77%                  | 0     |
| Dialisterinvisus                  | 3,25%                      | 8,88%                 | 6,06%                  | 0     |
| Desulfovibriodesulfuricans        | 4,15%                      | 7,34%                 | 5,75%                  | 0     |
| Faecalibacteriumprausnitzii       | 2,33%                      | 6,60%                 | 4,47%                  | 0     |
| _Clostridium_difficile            | 2,25%                      | 5,56%                 | 3,91%                  | 0     |
| Clostridiumymbiosum               | 4,73%                      | 3,01%                 | 3,87%                  | 0     |
| Clostridiumasparagiforme          | 0,45%                      | 4,44%                 | 2,44%                  | 0     |
| Parabacteroidesjohnsonii          | 0,21%                      | 3,61%                 | 1,91%                  | 0     |
| Bifidobacteriumbifidum            | 1,23%                      | 1,09%                 | 1,16%                  | 0     |
| Bacteroidesxylanisolvens          | -0,37%                     | 0,23%                 | -0,07%                 | 0     |
| butyrate_producingbacteriumSM4_1  | -3,68%                     | 2,77%                 | -0,46%                 | 0     |
| Acidaminococcusfermentans         | -3,62%                     | -1,25%                | -2,44%                 | 0     |
| Clostridiumaccharolyticum         | -4,71%                     | -0,57%                | -2,64%                 | 0     |
| Coprococcuscomes                  | -1,46%                     | -5,60%                | -3,53%                 | 0     |
| Bacteroidesplebeius               | -2,05%                     | -5,09%                | -3,57%                 | 0     |
| Bacteroidescellulosilyticus       | -8,87%                     | -0,09%                | -4,48%                 | 0     |
| Bacteroideshelcogenes             | -6,64%                     | -3,72%                | -5,18%                 | 0     |
| Bacteroidessp1114                 | -3,78%                     | -7,60%                | -5,69%                 | 0     |
| Bacteroidessalanitronis           | -5,42%                     | -8,19%                | -6,81%                 | 0     |

**Supplementary Table S1B (continued)**

|                                    |         |         |         |     |
|------------------------------------|---------|---------|---------|-----|
| Paludibacterpropionicigenes        | -6,79%  | -6,83%  | -6,81%  | 0   |
| Sutterellawadsworthensis           | -8,03%  | -6,20%  | -7,12%  | 0   |
| Holdemaniafiliformis               | -8,81%  | -7,65%  | -8,23%  | 0   |
| Prevotellacopri                    | -6,17%  | -10,31% | -8,24%  | 0   |
| Prevotellamelaninogenica           | -6,19%  | -10,42% | -8,31%  | 0   |
| Bacteroidessp116                   | -6,75%  | -11,14% | -8,94%  | 0   |
| Bacteroidesthetaiotaomicron        | -8,30%  | -10,02% | -9,16%  | 0   |
| Prevotellaintermedia               | -7,42%  | -11,46% | -9,44%  | 0   |
| Clostridialesbacterium1747FAA      | -11,68% | -8,12%  | -9,90%  | 0   |
| Prevotellaruminicola               | -8,66%  | -12,50% | -10,58% | 0   |
| Prevotelladenticola                | -9,09%  | -12,62% | -10,86% | 0   |
| BacteroidesspD20                   | -12,46% | -9,63%  | -11,05% | 0   |
| Clostridiumbolteae                 | -13,44% | -10,15% | -11,79% | 0   |
| Paraprevotellaxylaniphila          | -16,46% | -11,23% | -13,85% | 0   |
| Prevotelladentalis                 | -12,82% | -16,48% | -14,65% | 0   |
| Bacteroidesfinegoldii              | -17,11% | -12,54% | -14,83% | 0   |
| Bacteroidessp4136                  | -18,36% | -16,71% | -17,54% | 0   |
| _Ruminococcus_obeum                | -21,60% | -15,61% | -18,60% | 0   |
| Porphyromonasgingivalis            | -19,73% | -18,06% | -18,89% | 0   |
| Bacteroidesuniformis               | -20,70% | -17,85% | -19,27% | 0   |
| Phascolarctobacteriumsuccinatutens | -16,66% | -22,73% | -19,70% | 0   |
| Bacteroidesfluxus                  | -21,88% | -20,22% | -21,05% | 0   |
| butyrate_producingbacteriumSS3_4   | -21,48% | -21,62% | -21,55% | 0   |
| Bifidobacteriumlongum              | -24,52% | -21,37% | -22,95% | 0   |
| Roseburiaintestinalis              | -23,74% | -24,97% | -24,36% | 0   |
| butyrate_producingbacteriumSSC_2   | -23,57% | -25,36% | -24,46% | 0   |
| Megamonashypermegale               | -23,14% | -26,96% | -25,05% | 0   |
| Roseburiaulinivorans               | -25,43% | -28,78% | -27,11% | 0   |
| Parabacteroidesdistasonis          | -31,26% | -28,86% | -30,06% | 0   |
| Eubacteriumrectale                 | -30,49% | -34,19% | -32,34% | 0   |
| Bacteroidesstercoris               | -34,41% | -36,10% | -35,25% | 0   |
| _Ruminococcus_torques              | -39,53% | -38,45% | -38,99% | 0   |
| Parabacteroidesmerdae              | -39,77% | -38,40% | -39,09% | 0   |
| Ruminococcussp5139BFAA             | -41,63% | -40,89% | -41,26% | 0   |
| Megasphaeraelsdenii                | -43,23% | -39,81% | -41,52% | 0   |
| Coprococcuscaus                    | -45,79% | -43,95% | -44,87% | 0,5 |
| Bacteroidescaccae                  | -44,41% | -46,34% | -45,38% | 0,5 |

Supplementary Table S2A

*Elastic net regularization for different penalties ( $\alpha = 1$  corresponds to LASSO regression, while  $\alpha = 0.5$  is a mix of LASSO and Ridge regression) and different numbers of folds (3, 5, 8 and 15). The number of repetitions was always 1000. Percentages show the proportion of repetitions where the respective predictor variable (from the set of genera) was present in the selected optimal model. Tables are sorted according to the mean of the percentages for terms appearing in models with delta BMI as the response and models with RWL as the response.*

| 1000 repetitions                                                   |          |         |        |
|--------------------------------------------------------------------|----------|---------|--------|
| Sorted (mean)                                                      |          |         |        |
| Predictor variable importance: $\alpha = 1$ / number of folds = 3  |          |         |        |
| Predictor variable (genera)                                        | deltaBMI | RWL     | mean   |
| Akkermansia                                                        | 9,50%    | 17,30%  | 13,40% |
| <b>Symbiobacterium</b>                                             | 3,70%    | 23,00%  | 13,35% |
| Alistipes                                                          | 9,70%    | 14,60%  | 12,15% |
| <b>Pseudoflavonifractor</b>                                        | 4,90%    | 3,90%   | 4,40%  |
| Dorea                                                              | 0,90%    | 0,00%   | 0,45%  |
| Acidaminococcus                                                    | 0,20%    | 0,40%   | 0,30%  |
| Subdoligranulum                                                    | 0,00%    | 0,40%   | 0,20%  |
| Veillonella                                                        | 0,00%    | 0,20%   | 0,10%  |
| Eggerthella                                                        | 0,10%    | 0,00%   | 0,05%  |
| Parasutterella                                                     | 0,10%    | 0,00%   | 0,05%  |
| Staphylococcus                                                     | 0,10%    | 0,00%   | 0,05%  |
| Dialister                                                          | 0,00%    | 0,00%   | 0,00%  |
| Predictor variable importance: $\alpha = 1$ / number of folds = 5  |          |         |        |
| Predictor variable (genera)                                        | deltaBMI | RWL     | mean   |
| Akkermansia                                                        | 10,40%   | 46,10%  | 28,25% |
| <b>Symbiobacterium</b>                                             | 3,40%    | 51,80%  | 27,60% |
| Alistipes                                                          | 10,40%   | 26,40%  | 18,40% |
| <b>Pseudoflavonifractor</b>                                        | 6,90%    | 15,90%  | 11,40% |
| Dorea                                                              | 0,90%    | 0,00%   | 0,45%  |
| Acidaminococcus                                                    | 0,10%    | 0,00%   | 0,05%  |
| Dialister                                                          | 0,10%    | 0,00%   | 0,05%  |
| Eggerthella                                                        | 0,10%    | 0,00%   | 0,05%  |
| Parasutterella                                                     | 0,10%    | 0,00%   | 0,05%  |
| Staphylococcus                                                     | 0,10%    | 0,00%   | 0,05%  |
| Subdoligranulum                                                    | 0,00%    | 0,00%   | 0,00%  |
| Veillonella                                                        | 0,00%    | 0,00%   | 0,00%  |
| Predictor variable importance: $\alpha = 1$ / number of folds = 8  |          |         |        |
| Predictor variable (genera)                                        | deltaBMI | RWL     | mean   |
| Akkermansia                                                        | 8,00%    | 79,70%  | 43,85% |
| <b>Symbiobacterium</b>                                             | 4,70%    | 82,60%  | 43,65% |
| <b>Pseudoflavonifractor</b>                                        | 6,30%    | 48,80%  | 27,55% |
| Alistipes                                                          | 7,90%    | 21,60%  | 14,75% |
| Dorea                                                              | 0,30%    | 0,00%   | 0,15%  |
| Acidaminococcus                                                    | 0,00%    | 0,00%   | 0,00%  |
| Dialister                                                          | 0,00%    | 0,00%   | 0,00%  |
| Eggerthella                                                        | 0,00%    | 0,00%   | 0,00%  |
| Parasutterella                                                     | 0,00%    | 0,00%   | 0,00%  |
| Staphylococcus                                                     | 0,00%    | 0,00%   | 0,00%  |
| Subdoligranulum                                                    | 0,00%    | 0,00%   | 0,00%  |
| Veillonella                                                        | 0,00%    | 0,00%   | 0,00%  |
| Predictor variable importance: $\alpha = 1$ / number of folds = 15 |          |         |        |
| Predictor variable (genera)                                        | deltaBMI | RWL     | mean   |
| Akkermansia                                                        | 0,00%    | 100,00% | 50,00% |
| <b>Pseudoflavonifractor</b>                                        | 0,00%    | 100,00% | 50,00% |
| <b>Symbiobacterium</b>                                             | 0,00%    | 100,00% | 50,00% |
| Acidaminococcus                                                    | 0,00%    | 0,00%   | 0,00%  |
| Alistipes                                                          | 0,00%    | 0,00%   | 0,00%  |
| Dialister                                                          | 0,00%    | 0,00%   | 0,00%  |
| Dorea                                                              | 0,00%    | 0,00%   | 0,00%  |
| Eggerthella                                                        | 0,00%    | 0,00%   | 0,00%  |
| Parasutterella                                                     | 0,00%    | 0,00%   | 0,00%  |
| Staphylococcus                                                     | 0,00%    | 0,00%   | 0,00%  |
| Subdoligranulum                                                    | 0,00%    | 0,00%   | 0,00%  |
| Veillonella                                                        | 0,00%    | 0,00%   | 0,00%  |

Supplementary Table S2A (continued)

| 1000 repetitions                                                      |          |         |        |
|-----------------------------------------------------------------------|----------|---------|--------|
| Sorted (mean)                                                         |          |         |        |
| Predictor variable importance: $\alpha = 0.75$ / number of folds = 3  |          |         |        |
| Predictor variable (genera)                                           | deltaBMI | RWL     | mean   |
| Alistipes                                                             | 8,50%    | 20,40%  | 14,45% |
| <b>Symbiobacterium</b>                                                | 4,90%    | 21,10%  | 13,00% |
| Akkermansia                                                           | 7,40%    | 15,40%  | 11,40% |
| <b>Pseudoflavonifractor</b>                                           | 3,60%    | 5,50%   | 4,55%  |
| Dorea                                                                 | 0,30%    | 0,00%   | 0,15%  |
| Veillonella                                                           | 0,00%    | 0,20%   | 0,10%  |
| Acidaminococcus                                                       | 0,10%    | 0,00%   | 0,05%  |
| Parasutterella                                                        | 0,10%    | 0,00%   | 0,05%  |
| Dialister                                                             | 0,00%    | 0,00%   | 0,00%  |
| Eggerthella                                                           | 0,00%    | 0,00%   | 0,00%  |
| Staphylococcus                                                        | 0,00%    | 0,00%   | 0,00%  |
| Subdoligranulum                                                       | 0,00%    | 0,00%   | 0,00%  |
| Predictor variable importance: $\alpha = 0.75$ / number of folds = 5  |          |         |        |
| Predictor variable (genera)                                           | deltaBMI | RWL     | mean   |
| Alistipes                                                             | 6,70%    | 49,10%  | 27,90% |
| <b>Symbiobacterium</b>                                                | 3,90%    | 49,60%  | 26,75% |
| Akkermansia                                                           | 6,60%    | 42,50%  | 24,55% |
| <b>Pseudoflavonifractor</b>                                           | 2,80%    | 23,20%  | 13,00% |
| Dorea                                                                 | 0,30%    | 0,00%   | 0,15%  |
| Veillonella                                                           | 0,00%    | 0,10%   | 0,05%  |
| Acidaminococcus                                                       | 0,00%    | 0,00%   | 0,00%  |
| Dialister                                                             | 0,00%    | 0,00%   | 0,00%  |
| Eggerthella                                                           | 0,00%    | 0,00%   | 0,00%  |
| Parasutterella                                                        | 0,00%    | 0,00%   | 0,00%  |
| Staphylococcus                                                        | 0,00%    | 0,00%   | 0,00%  |
| Subdoligranulum                                                       | 0,00%    | 0,00%   | 0,00%  |
| Predictor variable importance: $\alpha = 0.75$ / number of folds = 8  |          |         |        |
| Predictor variable (genera)                                           | deltaBMI | RWL     | mean   |
| Alistipes                                                             | 9,50%    | 83,10%  | 46,30% |
| <b>Symbiobacterium</b>                                                | 8,00%    | 83,10%  | 45,55% |
| Akkermansia                                                           | 9,30%    | 79,70%  | 44,50% |
| <b>Pseudoflavonifractor</b>                                           | 6,10%    | 62,20%  | 34,15% |
| Acidaminococcus                                                       | 0,00%    | 0,00%   | 0,00%  |
| Dialister                                                             | 0,00%    | 0,00%   | 0,00%  |
| Dorea                                                                 | 0,00%    | 0,00%   | 0,00%  |
| Eggerthella                                                           | 0,00%    | 0,00%   | 0,00%  |
| Parasutterella                                                        | 0,00%    | 0,00%   | 0,00%  |
| Staphylococcus                                                        | 0,00%    | 0,00%   | 0,00%  |
| Subdoligranulum                                                       | 0,00%    | 0,00%   | 0,00%  |
| Veillonella                                                           | 0,00%    | 0,00%   | 0,00%  |
| Predictor variable importance: $\alpha = 0.75$ / number of folds = 15 |          |         |        |
| Predictor variable (genera)                                           | deltaBMI | RWL     | mean   |
| Akkermansia                                                           | 0,00%    | 100,00% | 50,00% |
| Alistipes                                                             | 0,00%    | 100,00% | 50,00% |
| <b>Pseudoflavonifractor</b>                                           | 0,00%    | 100,00% | 50,00% |
| <b>Symbiobacterium</b>                                                | 0,00%    | 100,00% | 50,00% |
| Acidaminococcus                                                       | 0,00%    | 0,00%   | 0,00%  |
| Dialister                                                             | 0,00%    | 0,00%   | 0,00%  |
| Dorea                                                                 | 0,00%    | 0,00%   | 0,00%  |
| Eggerthella                                                           | 0,00%    | 0,00%   | 0,00%  |
| Parasutterella                                                        | 0,00%    | 0,00%   | 0,00%  |
| Staphylococcus                                                        | 0,00%    | 0,00%   | 0,00%  |
| Subdoligranulum                                                       | 0,00%    | 0,00%   | 0,00%  |
| Veillonella                                                           | 0,00%    | 0,00%   | 0,00%  |

Supplementary Table S2A (continued)

| 1000 repetitions                                                     |          |         |        |
|----------------------------------------------------------------------|----------|---------|--------|
| Sorted (mean)                                                        |          |         |        |
| Predictor variable importance: $\alpha = 0.5$ / number of folds = 3  |          |         |        |
| Predictor variable (genera)                                          | deltaBMI | RWL     | mean   |
| Alistipes                                                            | 8,30%    | 23,40%  | 15,85% |
| <b>Symbiobacterium</b>                                               | 4,40%    | 23,40%  | 13,90% |
| Akkermansia                                                          | 7,50%    | 20,20%  | 13,85% |
| <b>Pseudoflavonifractor</b>                                          | 2,50%    | 6,80%   | 4,65%  |
| Parasutterella                                                       | 0,70%    | 0,00%   | 0,35%  |
| Subdoligranulum                                                      | 0,10%    | 0,60%   | 0,35%  |
| Acidaminococcus                                                      | 0,00%    | 0,10%   | 0,05%  |
| Eggerthella                                                          | 0,10%    | 0,00%   | 0,05%  |
| Veillonella                                                          | 0,00%    | 0,10%   | 0,05%  |
| Dialister                                                            | 0,00%    | 0,00%   | 0,00%  |
| Dorea                                                                | 0,00%    | 0,00%   | 0,00%  |
| Staphylococcus                                                       | 0,00%    | 0,00%   | 0,00%  |
| Predictor variable importance: $\alpha = 0.5$ / number of folds = 5  |          |         |        |
| Predictor variable (genera)                                          | deltaBMI | RWL     | mean   |
| Alistipes                                                            | 6,10%    | 47,50%  | 26,80% |
| <b>Symbiobacterium</b>                                               | 3,80%    | 47,50%  | 25,65% |
| Akkermansia                                                          | 5,90%    | 41,80%  | 23,85% |
| <b>Pseudoflavonifractor</b>                                          | 2,60%    | 18,40%  | 10,50% |
| Parasutterella                                                       | 0,40%    | 0,00%   | 0,20%  |
| Eggerthella                                                          | 0,30%    | 0,00%   | 0,15%  |
| Acidaminococcus                                                      | 0,00%    | 0,00%   | 0,00%  |
| Dialister                                                            | 0,00%    | 0,00%   | 0,00%  |
| Dorea                                                                | 0,00%    | 0,00%   | 0,00%  |
| Staphylococcus                                                       | 0,00%    | 0,00%   | 0,00%  |
| Subdoligranulum                                                      | 0,00%    | 0,00%   | 0,00%  |
| Veillonella                                                          | 0,00%    | 0,00%   | 0,00%  |
| Predictor variable importance: $\alpha = 0.5$ / number of folds = 8  |          |         |        |
| Predictor variable (genera)                                          | deltaBMI | RWL     | mean   |
| Alistipes                                                            | 9,30%    | 79,80%  | 44,55% |
| <b>Symbiobacterium</b>                                               | 6,70%    | 79,80%  | 43,25% |
| Akkermansia                                                          | 8,50%    | 76,30%  | 42,40% |
| <b>Pseudoflavonifractor</b>                                          | 5,00%    | 50,00%  | 27,50% |
| Eggerthella                                                          | 0,70%    | 0,00%   | 0,35%  |
| Acidaminococcus                                                      | 0,00%    | 0,00%   | 0,00%  |
| Dialister                                                            | 0,00%    | 0,00%   | 0,00%  |
| Dorea                                                                | 0,00%    | 0,00%   | 0,00%  |
| Parasutterella                                                       | 0,00%    | 0,00%   | 0,00%  |
| Staphylococcus                                                       | 0,00%    | 0,00%   | 0,00%  |
| Subdoligranulum                                                      | 0,00%    | 0,00%   | 0,00%  |
| Veillonella                                                          | 0,00%    | 0,00%   | 0,00%  |
| Predictor variable importance: $\alpha = 0.5$ / number of folds = 15 |          |         |        |
| Predictor variable (genera)                                          | deltaBMI | RWL     | mean   |
| Akkermansia                                                          | 0,00%    | 100,00% | 50,00% |
| Alistipes                                                            | 0,00%    | 100,00% | 50,00% |
| <b>Pseudoflavonifractor</b>                                          | 0,00%    | 100,00% | 50,00% |
| <b>Symbiobacterium</b>                                               | 0,00%    | 100,00% | 50,00% |
| Acidaminococcus                                                      | 0,00%    | 0,00%   | 0,00%  |
| Dialister                                                            | 0,00%    | 0,00%   | 0,00%  |
| Dorea                                                                | 0,00%    | 0,00%   | 0,00%  |
| Eggerthella                                                          | 0,00%    | 0,00%   | 0,00%  |
| Parasutterella                                                       | 0,00%    | 0,00%   | 0,00%  |
| Staphylococcus                                                       | 0,00%    | 0,00%   | 0,00%  |
| Subdoligranulum                                                      | 0,00%    | 0,00%   | 0,00%  |
| Veillonella                                                          | 0,00%    | 0,00%   | 0,00%  |



Supplementary Table S2B

Elastic net regularization for different penalties ( $\alpha = 1$  corresponds to LASSO regression, while  $\alpha = 0.5$  is a mix of LASSO and Ridge regression) and different numbers of folds (3, 5, 8 and 15). The number of repetitions was always 1000. Percentages show the proportion of repetitions where the respective predictor variable (from the set of species) was present in the selected optimal model. Tables are sorted according to the mean of the percentages for terms appearing in models with delta BMI as the response and models with RWL as the response.

| 1000 repetitions                                                  |          |        |        |
|-------------------------------------------------------------------|----------|--------|--------|
| Sorted (mean)                                                     |          |        |        |
| Predictor variable importance: $\alpha = 1$ / number of folds = 3 |          |        |        |
| Predictor variable (species)                                      | deltaBMI | RWL    | mean   |
| <b>Alistipesfinegoldii</b>                                        | 100,00%  | 19,50% | 59,75% |
| <b>Akkermansiamuciniphila</b>                                     | 9,00%    | 16,10% | 12,55% |
| <b>Ethanoligenensharbinense</b>                                   | 1,50%    | 15,10% | 8,30%  |
| Bacteroidesovatus                                                 | 1,30%    | 1,60%  | 1,45%  |
| Roseburiahominis                                                  | 1,30%    | 1,20%  | 1,25%  |
| Bacteroideseggerthii                                              | 0,90%    | 1,40%  | 1,15%  |
| Subdoligranulumvariabile                                          | 1,80%    | 0,00%  | 0,90%  |
| X_Clostridium_difficile                                           | 0,40%    | 0,00%  | 0,20%  |
| Coprococcuscomes                                                  | 0,10%    | 0,00%  | 0,05%  |
| Bacteroidesintestinalis                                           | 0,00%    | 0,00%  | 0,00%  |
| Bacteroidessp3133FAA                                              | 0,00%    | 0,00%  | 0,00%  |
| Bacteroidessp9142FAA                                              | 0,00%    | 0,00%  | 0,00%  |
| Dorealongicatena                                                  | 0,00%    | 0,00%  | 0,00%  |
| Eubacteriumeligens                                                | 0,00%    | 0,00%  | 0,00%  |
| Gordonibacterpamelaeae                                            | 0,00%    | 0,00%  | 0,00%  |
| Oscillibactervalericigenes                                        | 0,00%    | 0,00%  | 0,00%  |
| Phascolarctobacteriumsuccinatutens                                | 0,00%    | 0,00%  | 0,00%  |
| Pseudoflavonifractorcapillosus                                    | 0,00%    | 0,00%  | 0,00%  |

| Predictor variable importance: $\alpha = 1$ / number of folds = 5 |          |        |        |
|-------------------------------------------------------------------|----------|--------|--------|
| Predictor variable (species)                                      | deltaBMI | RWL    | mean   |
| <b>Alistipesfinegoldii</b>                                        | 100,00%  | 22,00% | 61,00% |
| <b>Akkermansiamuciniphila</b>                                     | 10,10%   | 19,10% | 14,60% |
| <b>Ethanoligenensharbinense</b>                                   | 0,30%    | 17,10% | 8,70%  |
| Bacteroidesovatus                                                 | 0,20%    | 1,30%  | 0,75%  |
| Roseburiahominis                                                  | 0,30%    | 0,80%  | 0,55%  |
| Bacteroideseggerthii                                              | 0,00%    | 1,00%  | 0,50%  |
| Subdoligranulumvariabile                                          | 0,40%    | 0,00%  | 0,20%  |
| Bacteroidesintestinalis                                           | 0,00%    | 0,00%  | 0,00%  |
| Bacteroidessp3133FAA                                              | 0,00%    | 0,00%  | 0,00%  |
| Bacteroidessp9142FAA                                              | 0,00%    | 0,00%  | 0,00%  |
| Coprococcuscomes                                                  | 0,00%    | 0,00%  | 0,00%  |
| Dorealongicatena                                                  | 0,00%    | 0,00%  | 0,00%  |
| Eubacteriumeligens                                                | 0,00%    | 0,00%  | 0,00%  |
| Gordonibacterpamelaeae                                            | 0,00%    | 0,00%  | 0,00%  |
| Oscillibactervalericigenes                                        | 0,00%    | 0,00%  | 0,00%  |
| Phascolarctobacteriumsuccinatutens                                | 0,00%    | 0,00%  | 0,00%  |
| Pseudoflavonifractorcapillosus                                    | 0,00%    | 0,00%  | 0,00%  |
| X_Clostridium_difficile                                           | 0,00%    | 0,00%  | 0,00%  |

| Predictor variable importance: $\alpha = 1$ / number of folds = 8 |          |        |        |
|-------------------------------------------------------------------|----------|--------|--------|
| Predictor variable (species)                                      | deltaBMI | RWL    | mean   |
| <b>Alistipesfinegoldii</b>                                        | 100,00%  | 24,70% | 62,35% |
| <b>Akkermansiamuciniphila</b>                                     | 7,40%    | 21,50% | 14,45% |
| <b>Ethanoligenensharbinense</b>                                   | 0,00%    | 21,10% | 10,55% |
| Bacteroideseggerthii                                              | 0,10%    | 1,90%  | 1,00%  |
| Bacteroidesovatus                                                 | 0,10%    | 1,90%  | 1,00%  |
| Roseburiahominis                                                  | 0,10%    | 1,80%  | 0,95%  |
| Subdoligranulumvariabile                                          | 0,20%    | 0,00%  | 0,10%  |
| X_Clostridium_difficile                                           | 0,10%    | 0,00%  | 0,05%  |
| Bacteroidesintestinalis                                           | 0,00%    | 0,00%  | 0,00%  |
| Bacteroidessp3133FAA                                              | 0,00%    | 0,00%  | 0,00%  |
| Bacteroidessp9142FAA                                              | 0,00%    | 0,00%  | 0,00%  |
| Coprococcuscomes                                                  | 0,00%    | 0,00%  | 0,00%  |
| Dorealongicatena                                                  | 0,00%    | 0,00%  | 0,00%  |
| Eubacteriumeligens                                                | 0,00%    | 0,00%  | 0,00%  |
| Gordonibacterpamelaeae                                            | 0,00%    | 0,00%  | 0,00%  |
| Oscillibactervalericigenes                                        | 0,00%    | 0,00%  | 0,00%  |
| Phascolarctobacteriumsuccinatutens                                | 0,00%    | 0,00%  | 0,00%  |
| Pseudoflavonifractorcapillosus                                    | 0,00%    | 0,00%  | 0,00%  |

| Predictor variable importance: $\alpha = 1$ / number of folds = 15 |          |     |      |
|--------------------------------------------------------------------|----------|-----|------|
| Predictor variable (species)                                       | deltaBMI | RWL | mean |

Supplementary Table S2B (contiued)

|                                    |         |       |        |
|------------------------------------|---------|-------|--------|
| <b>Alistipesfinegoldii</b>         | 100,00% | 0,00% | 50,00% |
| <b>Akkermansiamuciniphila</b>      | 0,00%   | 0,00% | 0,00%  |
| Bacteroideseggerthii               | 0,00%   | 0,00% | 0,00%  |
| Bacteroidesintestinalis            | 0,00%   | 0,00% | 0,00%  |
| Bacteroidesovatus                  | 0,00%   | 0,00% | 0,00%  |
| Bacteroidessp3133FAA               | 0,00%   | 0,00% | 0,00%  |
| Bacteroidessp9142FAA               | 0,00%   | 0,00% | 0,00%  |
| Coprococcuscomes                   | 0,00%   | 0,00% | 0,00%  |
| Dorealongicatena                   | 0,00%   | 0,00% | 0,00%  |
| <b>Ethanoligenensharbinense</b>    | 0,00%   | 0,00% | 0,00%  |
| Eubacteriumeligens                 | 0,00%   | 0,00% | 0,00%  |
| Gordonibacterpamelaeae             | 0,00%   | 0,00% | 0,00%  |
| Oscillibactervalericigenes         | 0,00%   | 0,00% | 0,00%  |
| Phascolarctobacteriumsuccinatutens | 0,00%   | 0,00% | 0,00%  |
| Pseudoflavonifractorcapillosus     | 0,00%   | 0,00% | 0,00%  |
| Roseburiahominis                   | 0,00%   | 0,00% | 0,00%  |
| Subdoligranulumvariabile           | 0,00%   | 0,00% | 0,00%  |
| X_Clostridium_difficile            | 0,00%   | 0,00% | 0,00%  |

1000 repetitions

## Sorted (mean)

Predictor variable importance:  $\alpha = 0.75$  / number of folds = 3

| Predictor variable (species)       | deltaBMI | RWL    | mean   |
|------------------------------------|----------|--------|--------|
| <b>Alistipesfinegoldii</b>         | 15,50%   | 16,90% | 16,20% |
| <b>Akkermansiamuciniphila</b>      | 6,70%    | 15,20% | 10,95% |
| <b>Ethanoligenensharbinense</b>    | 0,70%    | 13,60% | 7,15%  |
| Bacteroidesovatus                  | 0,20%    | 1,20%  | 0,70%  |
| Roseburiahominis                   | 0,20%    | 0,90%  | 0,55%  |
| Bacteroideseggerthii               | 0,00%    | 0,90%  | 0,45%  |
| Pseudoflavonifractorcapillosus     | 0,00%    | 0,50%  | 0,25%  |
| Subdoligranulumvariabile           | 0,30%    | 0,00%  | 0,15%  |
| Bacteroidesintestinalis            | 0,00%    | 0,00%  | 0,00%  |
| Bacteroidessp3133FAA               | 0,00%    | 0,00%  | 0,00%  |
| Bacteroidessp9142FAA               | 0,00%    | 0,00%  | 0,00%  |
| Coprococcuscomes                   | 0,00%    | 0,00%  | 0,00%  |
| Dorealongicatena                   | 0,00%    | 0,00%  | 0,00%  |
| Eubacteriumeligens                 | 0,00%    | 0,00%  | 0,00%  |
| Gordonibacterpamelaeae             | 0,00%    | 0,00%  | 0,00%  |
| Oscillibactervalericigenes         | 0,00%    | 0,00%  | 0,00%  |
| Phascolarctobacteriumsuccinatutens | 0,00%    | 0,00%  | 0,00%  |
| X_Clostridium_difficile            | 0,00%    | 0,00%  | 0,00%  |

Predictor variable importance:  $\alpha = 0.75$  / number of folds = 5

| Predictor variable (species)       | deltaBMI | RWL    | mean   |
|------------------------------------|----------|--------|--------|
| <b>Alistipesfinegoldii</b>         | 16,20%   | 22,20% | 19,20% |
| <b>Akkermansiamuciniphila</b>      | 6,10%    | 18,90% | 12,50% |
| <b>Ethanoligenensharbinense</b>    | 0,10%    | 16,00% | 8,05%  |
| Bacteroidesovatus                  | 0,00%    | 0,50%  | 0,25%  |
| Bacteroideseggerthii               | 0,00%    | 0,30%  | 0,15%  |
| Roseburiahominis                   | 0,00%    | 0,30%  | 0,15%  |
| Pseudoflavonifractorcapillosus     | 0,00%    | 0,10%  | 0,05%  |
| Bacteroidesintestinalis            | 0,00%    | 0,00%  | 0,00%  |
| Bacteroidessp3133FAA               | 0,00%    | 0,00%  | 0,00%  |
| Bacteroidessp9142FAA               | 0,00%    | 0,00%  | 0,00%  |
| Coprococcuscomes                   | 0,00%    | 0,00%  | 0,00%  |
| Dorealongicatena                   | 0,00%    | 0,00%  | 0,00%  |
| Eubacteriumeligens                 | 0,00%    | 0,00%  | 0,00%  |
| Gordonibacterpamelaeae             | 0,00%    | 0,00%  | 0,00%  |
| Oscillibactervalericigenes         | 0,00%    | 0,00%  | 0,00%  |
| Phascolarctobacteriumsuccinatutens | 0,00%    | 0,00%  | 0,00%  |
| Subdoligranulumvariabile           | 0,00%    | 0,00%  | 0,00%  |
| X_Clostridium_difficile            | 0,00%    | 0,00%  | 0,00%  |

Predictor variable importance:  $\alpha = 0.75$  / number of folds = 8

| Predictor variable (species)    | deltaBMI | RWL    | mean   |
|---------------------------------|----------|--------|--------|
| <b>Alistipesfinegoldii</b>      | 16,30%   | 22,20% | 19,25% |
| <b>Akkermansiamuciniphila</b>   | 6,60%    | 21,30% | 13,95% |
| <b>Ethanoligenensharbinense</b> | 0,00%    | 19,70% | 9,85%  |
| Bacteroideseggerthii            | 0,00%    | 0,60%  | 0,30%  |
| Bacteroidesovatus               | 0,00%    | 0,60%  | 0,30%  |
| Roseburiahominis                | 0,00%    | 0,50%  | 0,25%  |
| Bacteroidesintestinalis         | 0,00%    | 0,00%  | 0,00%  |
| Bacteroidessp3133FAA            | 0,00%    | 0,00%  | 0,00%  |
| Bacteroidessp9142FAA            | 0,00%    | 0,00%  | 0,00%  |
| Coprococcuscomes                | 0,00%    | 0,00%  | 0,00%  |
| Dorealongicatena                | 0,00%    | 0,00%  | 0,00%  |
| Eubacteriumeligens              | 0,00%    | 0,00%  | 0,00%  |

Supplementary Table S2B (contiued)

|                                    |       |       |       |
|------------------------------------|-------|-------|-------|
| Gordonibacterpamelaeae             | 0,00% | 0,00% | 0,00% |
| Oscillibactervalericigenes         | 0,00% | 0,00% | 0,00% |
| Phascolarctobacteriumsuccinatutens | 0,00% | 0,00% | 0,00% |
| Pseudoflavonifractorcapillosus     | 0,00% | 0,00% | 0,00% |
| Subdoligranulumvariabile           | 0,00% | 0,00% | 0,00% |
| X_Clostridium_difficile            | 0,00% | 0,00% | 0,00% |

Predictor variable importance:  $\alpha = 0.75$  / number of folds = 15

| Predictor variable (species)       | deltaBMI | RWL   | mean  |
|------------------------------------|----------|-------|-------|
| <b>Akkermansiamuciniphila</b>      | 0,00%    | 0,00% | 0,00% |
| <b>Alistipesfinegoldii</b>         | 0,00%    | 0,00% | 0,00% |
| Bacteroideseggerthii               | 0,00%    | 0,00% | 0,00% |
| Bacteroidesintestinalis            | 0,00%    | 0,00% | 0,00% |
| Bacteroidesovatus                  | 0,00%    | 0,00% | 0,00% |
| Bacteroidessp3133FAA               | 0,00%    | 0,00% | 0,00% |
| Bacteroidessp9142FAA               | 0,00%    | 0,00% | 0,00% |
| Coprococcuscomes                   | 0,00%    | 0,00% | 0,00% |
| Dorealongicatena                   | 0,00%    | 0,00% | 0,00% |
| <b>Ethanoligenensharbinense</b>    | 0,00%    | 0,00% | 0,00% |
| Eubacteriumeligens                 | 0,00%    | 0,00% | 0,00% |
| Gordonibacterpamelaeae             | 0,00%    | 0,00% | 0,00% |
| Oscillibactervalericigenes         | 0,00%    | 0,00% | 0,00% |
| Phascolarctobacteriumsuccinatutens | 0,00%    | 0,00% | 0,00% |
| Pseudoflavonifractorcapillosus     | 0,00%    | 0,00% | 0,00% |
| Roseburiahominis                   | 0,00%    | 0,00% | 0,00% |
| Subdoligranulumvariabile           | 0,00%    | 0,00% | 0,00% |
| X_Clostridium_difficile            | 0,00%    | 0,00% | 0,00% |

1000 repetitions

Sorted (mean)

Predictor variable importance:  $\alpha = 0.5$  / number of folds = 3

| Predictor variable (species)       | deltaBMI | RWL     | mean   |
|------------------------------------|----------|---------|--------|
| <b>Alistipesfinegoldii</b>         | 14,50%   | 100,00% | 57,25% |
| <b>Akkermansiamuciniphila</b>      | 8,20%    | 14,80%  | 11,50% |
| <b>Ethanoligenensharbinense</b>    | 1,80%    | 14,80%  | 8,30%  |
| Pseudoflavonifractorcapillosus     | 1,60%    | 7,80%   | 4,70%  |
| Oscillibactervalericigenes         | 0,00%    | 2,50%   | 1,25%  |
| Bacteroidesovatus                  | 0,30%    | 1,90%   | 1,10%  |
| Bacteroidesintestinalis            | 1,50%    | 0,00%   | 0,75%  |
| Roseburiahominis                   | 0,20%    | 0,80%   | 0,50%  |
| Gordonibacterpamelaeae             | 0,90%    | 0,00%   | 0,45%  |
| Subdoligranulumvariabile           | 0,90%    | 0,00%   | 0,45%  |
| Bacteroideseggerthii               | 0,10%    | 0,70%   | 0,40%  |
| Eubacteriumeligens                 | 0,10%    | 0,20%   | 0,15%  |
| Bacteroidessp3133FAA               | 0,10%    | 0,00%   | 0,05%  |
| Bacteroidessp9142FAA               | 0,10%    | 0,00%   | 0,05%  |
| Dorealongicatena                   | 0,10%    | 0,00%   | 0,05%  |
| Phascolarctobacteriumsuccinatutens | 0,10%    | 0,00%   | 0,05%  |
| Coprococcuscomes                   | 0,00%    | 0,00%   | 0,00%  |
| X_Clostridium_difficile            | 0,00%    | 0,00%   | 0,00%  |

Predictor variable importance:  $\alpha = 0.5$  / number of folds = 5

| Predictor variable (species)       | deltaBMI | RWL     | mean   |
|------------------------------------|----------|---------|--------|
| <b>Alistipesfinegoldii</b>         | 12,90%   | 100,00% | 56,45% |
| <b>Akkermansiamuciniphila</b>      | 6,40%    | 14,80%  | 10,60% |
| <b>Ethanoligenensharbinense</b>    | 0,90%    | 14,80%  | 7,85%  |
| Pseudoflavonifractorcapillosus     | 0,50%    | 6,60%   | 3,55%  |
| Bacteroidesovatus                  | 0,20%    | 0,50%   | 0,35%  |
| Gordonibacterpamelaeae             | 0,70%    | 0,00%   | 0,35%  |
| Bacteroidesintestinalis            | 0,40%    | 0,00%   | 0,20%  |
| Oscillibactervalericigenes         | 0,00%    | 0,40%   | 0,20%  |
| Roseburiahominis                   | 0,10%    | 0,10%   | 0,10%  |
| Subdoligranulumvariabile           | 0,20%    | 0,00%   | 0,10%  |
| Bacteroideseggerthii               | 0,00%    | 0,10%   | 0,05%  |
| Bacteroidessp3133FAA               | 0,00%    | 0,00%   | 0,00%  |
| Bacteroidessp9142FAA               | 0,00%    | 0,00%   | 0,00%  |
| Coprococcuscomes                   | 0,00%    | 0,00%   | 0,00%  |
| Dorealongicatena                   | 0,00%    | 0,00%   | 0,00%  |
| Eubacteriumeligens                 | 0,00%    | 0,00%   | 0,00%  |
| Phascolarctobacteriumsuccinatutens | 0,00%    | 0,00%   | 0,00%  |
| X_Clostridium_difficile            | 0,00%    | 0,00%   | 0,00%  |

Predictor variable importance:  $\alpha = 0.5$  / number of folds = 8

| Predictor variable (species)  | deltaBMI | RWL     | mean   |
|-------------------------------|----------|---------|--------|
| <b>Alistipesfinegoldii</b>    | 9,40%    | 100,00% | 54,70% |
| <b>Akkermansiamuciniphila</b> | 4,20%    | 14,50%  | 9,35%  |

Supplementary Table S2B (contiued)

|                                    |       |        |       |
|------------------------------------|-------|--------|-------|
| <b>Ethanoligenensharbinense</b>    | 0,00% | 14,50% | 7,25% |
| Pseudoflavonifractorcapillosus     | 0,00% | 4,20%  | 2,10% |
| Bacteroideseggerthii               | 0,00% | 0,30%  | 0,15% |
| Bacteroidesovatus                  | 0,00% | 0,30%  | 0,15% |
| Roseburiahominis                   | 0,00% | 0,30%  | 0,15% |
| Bacteroidesintestinalis            | 0,00% | 0,00%  | 0,00% |
| Bacteroidessp3133FAA               | 0,00% | 0,00%  | 0,00% |
| Bacteroidessp9142FAA               | 0,00% | 0,00%  | 0,00% |
| Coprococcuscomes                   | 0,00% | 0,00%  | 0,00% |
| Dorealongicatena                   | 0,00% | 0,00%  | 0,00% |
| Eubacteriumeligens                 | 0,00% | 0,00%  | 0,00% |
| Gordonibacterpamelaeae             | 0,00% | 0,00%  | 0,00% |
| Oscillibactervalericigenes         | 0,00% | 0,00%  | 0,00% |
| Phascolarctobacteriumsuccinatutens | 0,00% | 0,00%  | 0,00% |
| Subdoligranulumvariabile           | 0,00% | 0,00%  | 0,00% |
| X_Clostridium_difficile            | 0,00% | 0,00%  | 0,00% |

Predictor variable importance:  $\alpha = 0.5$  / number of folds = 15

| Predictor variable (species)       | deltaBMI | RWL     | mean   |
|------------------------------------|----------|---------|--------|
| <b>Alistipesfinegoldii</b>         | 0,00%    | 100,00% | 50,00% |
| <b>Akkermansiamuciniphila</b>      | 0,00%    | 0,00%   | 0,00%  |
| Bacteroideseggerthii               | 0,00%    | 0,00%   | 0,00%  |
| Bacteroidesintestinalis            | 0,00%    | 0,00%   | 0,00%  |
| Bacteroidesovatus                  | 0,00%    | 0,00%   | 0,00%  |
| Bacteroidessp3133FAA               | 0,00%    | 0,00%   | 0,00%  |
| Bacteroidessp9142FAA               | 0,00%    | 0,00%   | 0,00%  |
| Coprococcuscomes                   | 0,00%    | 0,00%   | 0,00%  |
| Dorealongicatena                   | 0,00%    | 0,00%   | 0,00%  |
| <b>Ethanoligenensharbinense</b>    | 0,00%    | 0,00%   | 0,00%  |
| Eubacteriumeligens                 | 0,00%    | 0,00%   | 0,00%  |
| Gordonibacterpamelaeae             | 0,00%    | 0,00%   | 0,00%  |
| Oscillibactervalericigenes         | 0,00%    | 0,00%   | 0,00%  |
| Phascolarctobacteriumsuccinatutens | 0,00%    | 0,00%   | 0,00%  |
| Pseudoflavonifractorcapillosus     | 0,00%    | 0,00%   | 0,00%  |
| Roseburiahominis                   | 0,00%    | 0,00%   | 0,00%  |
| Subdoligranulumvariabile           | 0,00%    | 0,00%   | 0,00%  |
| X_Clostridium_difficile            | 0,00%    | 0,00%   | 0,00%  |

# Supplementary Table S3A

Calculation of importance indices (column D) and ranks (column E) and a combined index value (column F) to determine a list of the most important predictor variables from the set of genera in terms of the Monte Carlo method and a specific set of weights ("weights 2", see cells D9:D11).

|                         | weight |
|-------------------------|--------|
| model-weighted overall  | 10,00% |
| model-weighted df all   | 45,00% |
| av. variable importance | 45,00% |

| idx | ct | final list (weighted; ordered)<br>species     | final<br>index | final<br>rank | final<br>indValue | ch. rel. (%) |
|-----|----|-----------------------------------------------|----------------|---------------|-------------------|--------------|
| 43  |    | 1 Megasphaera                                 | 1,0000         | 1,8250        | 0,9973            | -8,13%       |
| 70  |    | 2 Symbiobacterium                             | 0,8816         | 2,4750        | 0,9162            | -27,19%      |
| 58  |    | 3 Marvinbryantia                              | 0,5310         | 7,1250        | 0,6671            | -5,34%       |
| 12  |    | 4 Blautia                                     | 0,4706         | 5,7250        | 0,6315            | -2,85%       |
| 2   |    | 5 Alistipes                                   | 0,4627         | 9,5750        | 0,6135            | -16,27%      |
| 80  |    | 6 Haemophilus                                 | 0,3517         | 17,4000       | 0,5137            | -3,33%       |
| 9   |    | 7 Akkermansia                                 | 0,3458         | 21,4000       | 0,4966            | -0,40%       |
| 22  |    | 8 Pseudoflavonifractor                        | 0,3137         | 15,5250       | 0,4946            | -4,84%       |
| 17  |    | 9 Oscillibacter                               | 0,2908         | 18,1500       | 0,4706            | -1,61%       |
| 40  |    | 10 Ethanoligenens                             | 0,3386         | 30,1000       | 0,4631            | -0,50%       |
| 41  |    | 11 Gordonibacter                              | 0,2858         | 20,1250       | 0,4607            | -2,41%       |
| 83  |    | 12 Human_endogenous_retroviruses              | 0,2765         | 21,6250       | 0,4496            | -6,77%       |
| 46  |    | 13 Burkholderia                               | 0,2122         | 17,8500       | 0,4192            | -3,27%       |
| 50  |    | 14 Treponema                                  | 0,2104         | 21,6500       | 0,4055            | -1,29%       |
| 78  |    | 15 Heliobacterium                             | 0,2188         | 24,9250       | 0,4003            | -2,06%       |
| 92  |    | 16 Corynebacterium                            | 0,2082         | 25,2750       | 0,3920            | -2,22%       |
| 64  |    | 17 Streptomyces                               | 0,2048         | 27,2250       | 0,3833            | -1,63%       |
| 79  |    | 18 Sphaerochaeta                              | 0,1925         | 26,6250       | 0,3771            | -2,50%       |
| 95  |    | 19 Propionibacterium                          | 0,2219         | 35,4250       | 0,3677            | -1,00%       |
| 36  |    | 20 Eggerthella                                | 0,2230         | 36,7750       | 0,3640            | -1,12%       |
| 89  |    | 21 Bordetella                                 | 0,1789         | 29,1000       | 0,3599            | -0,23%       |
| 31  |    | 22 unclassified_Erysipelotrichaceae           | 0,2092         | 35,4750       | 0,3591            | -0,27%       |
| 42  |    | 23 Dorea                                      | 0,1808         | 30,0250       | 0,3581            | -2,46%       |
| 85  |    | 24 Deinococcus                                | 0,1832         | 33,1750       | 0,3493            | -0,22%       |
| 35  |    | 25 Streptococcus                              | 0,1669         | 30,1250       | 0,3485            | -0,28%       |
| 54  |    | 26 Slackia                                    | 0,1884         | 34,7750       | 0,3475            | -0,87%       |
| 90  |    | 27 Acidovorax                                 | 0,1595         | 29,8500       | 0,3445            | -0,31%       |
| 82  |    | 28 Dysgonomonas                               | 0,1599         | 30,2500       | 0,3434            | -2,82%       |
| 91  |    | 29 Aeromonas                                  | 0,1557         | 32,3500       | 0,3337            | -0,57%       |
| 62  |    | 30 Desulfotobacterium                         | 0,1603         | 33,8500       | 0,3318            | -0,88%       |
| 99  |    | 31 Mycobacterium                              | 0,1856         | 39,8500       | 0,3289            | -1,32%       |
| 39  |    | 32 Enterococcus                               | 0,1779         | 39,6000       | 0,3246            | -2,22%       |
| 18  |    | 33 Megamonas                                  | 0,1594         | 38,0500       | 0,3173            | -0,46%       |
| 75  |    | 34 Ralstonia                                  | 0,1480         | 36,2000       | 0,3159            | -0,09%       |
| 37  |    | 35 Porphyromonas                              | 0,1551         | 37,7250       | 0,3156            | -0,02%       |
| 11  |    | 36 Bifidobacterium                            | 0,1712         | 41,0000       | 0,3155            | -0,46%       |
| 30  |    | 37 unclassified_Ruminococcaceae               | 0,1735         | 41,9000       | 0,3140            | -0,26%       |
| 94  |    | 38 Anaeromyxobacter                           | 0,1524         | 37,8750       | 0,3132            | -0,88%       |
| 66  |    | 39 Fretibacterium                             | 0,1657         | 41,4000       | 0,3105            | -0,30%       |
| 65  |    | 40 Parasutterella                             | 0,1788         | 44,3250       | 0,3096            | -0,88%       |
| 102 |    | 41 Spirochaeta                                | 0,1606         | 41,4750       | 0,3068            | -0,97%       |
| 48  |    | 42 Holdemania                                 | 0,1617         | 42,6000       | 0,3039            | -2,28%       |
| 57  |    | 43 Desulfotomaculum                           | 0,1512         | 42,5750       | 0,2969            | -1,45%       |
| 10  |    | 44 Clostridium                                | 0,1630         | 46,2750       | 0,2926            | -0,63%       |
| 87  |    | 45 Cupriavidus                                | 0,1382         | 41,8250       | 0,2908            | -1,07%       |
| 51  |    | 46 Pseudomonas                                | 0,1349         | 42,1000       | 0,2877            | -0,70%       |
| 71  |    | 47 Enterobacter                               | 0,1381         | 43,3500       | 0,2857            | -1,42%       |
| 1   |    | 48 Bacteroides                                | 0,1449         | 45,9500       | 0,2816            | -0,18%       |
| 60  |    | 49 Geobacter                                  | 0,1404         | 45,2000       | 0,2811            | -2,95%       |
| 26  |    | 50 Collinsella                                | 0,1306         | 45,7250       | 0,2728            | -1,73%       |
| 23  |    | 51 Paraprevotella                             | 0,1341         | 47,8500       | 0,2681            | -1,08%       |
| 81  |    | 52 unclassified_Burkholderiales_miscellaneous | 0,1578         | 53,5250       | 0,2652            | -5,04%       |
| 5   |    | 53 Parabacteroides                            | 0,1416         | 54,3000       | 0,2519            | -0,68%       |
| 101 |    | 54 Geobacillus                                | 0,1205         | 50,5500       | 0,2501            | -1,88%       |
| 53  |    | 55 Olsenella                                  | 0,1382         | 55,5500       | 0,2455            | -1,08%       |
| 19  |    | 56 Subdoligranulum                            | 0,1228         | 53,2500       | 0,2428            | -0,08%       |
| 52  |    | 57 Paenibacillus                              | 0,1245         | 53,6500       | 0,2426            | -3,27%       |
| 38  |    | 58 Anaerotruncus                              | 0,1072         | 52,5500       | 0,2347            | -0,61%       |
| 13  |    | 59 unclassified_Clostridiales_miscellaneous   | 0,1285         | 57,3000       | 0,2332            | -0,89%       |
| 33  |    | 60 unclassified_Peptostreptococcaceae         | 0,1255         | 57,3250       | 0,2312            | -3,37%       |
| 98  |    | 61 Rhizobium                                  | 0,1100         | 56,5500       | 0,2234            | -4,74%       |
| 61  |    | 62 Coriobacterium                             | 0,1117         | 60,1000       | 0,2128            | -2,35%       |

Supplementary Table S3A (continued)

|     |     |                                |        |          |        |         |
|-----|-----|--------------------------------|--------|----------|--------|---------|
| 6   | 63  | Prevotella                     | 0,1129 | 61,8500  | 0,2078 | -0,71%  |
| 47  | 64  | unclassified_sequences         | 0,1040 | 60,5000  | 0,2063 | -1,96%  |
| 4   | 65  | Eubacterium                    | 0,1176 | 64,4750  | 0,2023 | -2,15%  |
| 14  | 66  | Odoribacter                    | 0,1026 | 62,7750  | 0,1979 | -0,61%  |
| 100 | 67  | Bradyrhizobium                 | 0,0996 | 62,5250  | 0,1967 | -0,96%  |
| 74  | 68  | environmental_samples_Bacteria | 0,1032 | 63,8250  | 0,1948 | -1,38%  |
| 77  | 69  | Azospirillum                   | 0,0978 | 63,5500  | 0,1921 | -0,23%  |
| 21  | 70  | unclassified_Lachnospiraceae   | 0,1263 | 69,4500  | 0,1917 | -0,77%  |
| 44  | 71  | Bacillus                       | 0,1115 | 66,9000  | 0,1902 | -0,27%  |
| 97  | 72  | Klebsiella                     | 0,0982 | 64,3750  | 0,1897 | -0,13%  |
| 32  | 73  | Butyrivibrio                   | 0,1010 | 65,0000  | 0,1895 | -0,51%  |
| 45  | 74  | Selenomonas                    | 0,0911 | 63,3000  | 0,1885 | -0,31%  |
| 59  | 75  | Barnesiella                    | 0,1135 | 68,0000  | 0,1879 | -0,21%  |
| 29  | 76  | Tannerella                     | 0,0862 | 62,6000  | 0,1875 | -1,44%  |
| 34  | 77  | Escherichia                    | 0,1039 | 67,0000  | 0,1848 | -0,56%  |
| 96  | 78  | Syntrophobotulus               | 0,0938 | 65,2750  | 0,1838 | -1,63%  |
| 49  | 79  | Paludibacter                   | 0,0997 | 67,3750  | 0,1808 | -3,43%  |
| 88  | 80  | Oribacterium                   | 0,0891 | 67,1250  | 0,1746 | -1,14%  |
| 93  | 81  | Rhodospirillum                 | 0,0853 | 66,9500  | 0,1726 | -10,36% |
| 72  | 82  | Flavobacterium                 | 0,0822 | 71,7500  | 0,1547 | -2,26%  |
| 67  | 83  | Bacteroides_pectinophilus      | 0,0949 | 75,3750  | 0,1512 | -1,52%  |
| 15  | 84  | Coprococcus                    | 0,0834 | 73,7500  | 0,1489 | -6,42%  |
| 56  | 85  | Lactobacillus                  | 0,0800 | 75,9500  | 0,1394 | -6,24%  |
| 7   | 86  | Roseburia                      | 0,0856 | 79,7250  | 0,1307 | -4,46%  |
| 68  | 87  | Capnocytophaga                 | 0,0797 | 80,3000  | 0,1248 | -5,79%  |
| 73  | 88  | Cellulosilyticum               | 0,0792 | 82,3750  | 0,1176 | -0,21%  |
| 27  | 89  | Bilophila                      | 0,0764 | 81,9000  | 0,1174 | -8,59%  |
| 24  | 90  | Phascolarctobacterium          | 0,0769 | 85,0500  | 0,1073 | -11,96% |
| 69  | 91  | Pedobacter                     | 0,0689 | 87,3250  | 0,0944 | -1,41%  |
| 8   | 92  | Ruminococcus                   | 0,0704 | 88,0250  | 0,0931 | -0,16%  |
| 20  | 93  | Dialister                      | 0,0642 | 86,8250  | 0,0930 | -6,25%  |
| 86  | 94  | Sphingobacterium               | 0,0717 | 90,1000  | 0,0872 | -6,67%  |
| 76  | 95  | Staphylococcus                 | 0,0708 | 91,6750  | 0,0813 | -2,83%  |
| 3   | 96  | Faecalibacterium               | 0,0702 | 92,2500  | 0,0790 | -3,77%  |
| 55  | 97  | Campylobacter                  | 0,0620 | 91,5000  | 0,0761 | -15,68% |
| 16  | 98  | Acidaminococcus                | 0,0600 | 94,7000  | 0,0641 | -17,53% |
| 84  | 99  | Chitinophaga                   | 0,0589 | 97,9000  | 0,0529 | -8,86%  |
| 28  | 100 | Sutterella                     | 0,0593 | 99,4000  | 0,0482 | -5,52%  |
| 25  | 101 | Desulfovibrio                  | 0,0582 | 99,9750  | 0,0455 | -9,06%  |
| 63  | 102 | Veillonella                    | 0,0572 | 101,0250 | 0,0414 |         |



# Supplementary Table S3B

Calculation of importance indices (column D) and ranks (column E) and a combined index value (column F) to determine a list of the most important predictor variables from the set of species in terms of the Monte Carlo method and a specific set of weights ("weights 2", see cells D9:D11).

|                         | weight |
|-------------------------|--------|
| model-weighted overall  | 10,00% |
| model-weighted df all   | 45,00% |
| av. variable importance | 45,00% |

| idx | ct | final list (weighted; ordered)<br>species | final<br>index | final<br>rank | final<br>indValue | ch. rel. (%) |
|-----|----|-------------------------------------------|----------------|---------------|-------------------|--------------|
| 8   | 1  | Alistipesfinegoldii                       | 0,9329         | 1,9500        | 0,9522            | -23,25%      |
| 59  | 2  | Bacteroidescaccae                         | 0,6193         | 5,8000        | 0,7308            | -5,98%       |
| 20  | 3  | AlistipesspHGB5                           | 0,5531         | 5,6750        | 0,6871            | -10,24%      |
| 12  | 4  | Roseburiaintestinalis                     | 0,4920         | 14,8750       | 0,6167            | -2,07%       |
| 11  | 5  | Akkermansiamuciniphila                    | 0,4507         | 10,2750       | 0,6040            | -6,57%       |
| 37  | 6  | Coprococcusatus                           | 0,3983         | 11,7500       | 0,5643            | -1,10%       |
| 34  | 7  | Megamonashypermegale                      | 0,3933         | 12,6500       | 0,5581            | -9,55%       |
| 67  | 8  | Bacteroidesintestinalis                   | 0,3542         | 21,1250       | 0,5048            | -0,31%       |
| 43  | 9  | Pseudoflavonifractorcapillosus            | 0,3357         | 17,7750       | 0,5032            | -0,29%       |
| 89  | 10 | Ethanoligenensharbinense                  | 0,3384         | 18,8000       | 0,5017            | -0,61%       |
| 33  | 11 | Oscillibactervalericigenes                | 0,3506         | 22,2750       | 0,4987            | -3,00%       |
| 90  | 12 | Gordonibacterpamelaeae                    | 0,3129         | 19,1250       | 0,4837            | -4,11%       |
| 98  | 13 | Megasphaeraelsdenii                       | 0,2928         | 21,1250       | 0,4638            | -1,81%       |
| 40  | 14 | Bacteroidesstercoris                      | 0,2656         | 18,1000       | 0,4554            | -2,65%       |
| 26  | 15 | X_Ruminococcus_obeum                      | 0,2808         | 25,0000       | 0,4434            | -1,01%       |
| 35  | 16 | Subdoligranulumvariabile                  | 0,2686         | 23,8750       | 0,4389            | -0,88%       |
| 52  | 17 | Collinsellaerofaciens                     | 0,2636         | 24,0250       | 0,4350            | -0,69%       |
| 31  | 18 | Bifidobacteriumlongum                     | 0,2844         | 29,2750       | 0,4321            | -1,72%       |
| 88  | 19 | Ruminococcusssp5139BFAA                   | 0,2567         | 25,8500       | 0,4246            | -5,05%       |
| 22  | 20 | X_Ruminococcus_torques                    | 0,2303         | 27,0500       | 0,4032            | -0,48%       |
| 79  | 21 | Bifidobacteriumbifidum                    | 0,2416         | 30,0000       | 0,4012            | -0,54%       |
| 76  | 22 | Bacteroidescoprophius                     | 0,2102         | 24,1500       | 0,3991            | -1,99%       |
| 75  | 23 | Bacteroidescoprocola                      | 0,2156         | 27,7500       | 0,3911            | -2,14%       |
| 44  | 24 | Bacteroidesovatus                         | 0,2326         | 33,8750       | 0,3828            | -0,89%       |
| 16  | 25 | Alistipesputredinis                       | 0,2116         | 30,5750       | 0,3793            | -2,15%       |
| 71  | 26 | X_Clostridium_difficile                   | 0,2021         | 31,1500       | 0,3712            | -0,86%       |
| 54  | 27 | RuminococcaceabacteriumD16                | 0,2036         | 32,4500       | 0,3680            | -2,41%       |
| 15  | 28 | Eubacteriumeligens                        | 0,1709         | 28,4250       | 0,3591            | -0,39%       |
| 82  | 29 | Eggerthellalenta                          | 0,1923         | 33,3000       | 0,3577            | -0,01%       |
| 45  | 30 | Prevotelladentalis                        | 0,1678         | 28,2250       | 0,3577            | -1,74%       |
| 66  | 31 | Clostridiumbolteae                        | 0,2277         | 42,6000       | 0,3515            | -0,20%       |
| 69  | 32 | Ruminococcuschampanellensis               | 0,1817         | 33,2750       | 0,3508            | -5,93%       |
| 64  | 33 | Parabacteroidesmerdae                     | 0,1634         | 35,9500       | 0,3300            | -2,18%       |
| 21  | 34 | butyrate_producingbacteriumSS3_4          | 0,1901         | 43,7250       | 0,3228            | -3,05%       |
| 73  | 35 | Clostridiumleptum                         | 0,1466         | 37,7500       | 0,3129            | -1,91%       |
| 13  | 36 | Prevotellacopri                           | 0,1251         | 35,1500       | 0,3070            | -1,38%       |
| 58  | 37 | Roseburiaulinivorans                      | 0,1291         | 37,3000       | 0,3027            | -0,42%       |
| 36  | 38 | Prevotellaruminicola                      | 0,1457         | 41,1500       | 0,3015            | -0,74%       |
| 51  | 39 | Tannerellaforsythia                       | 0,1500         | 42,7250       | 0,2992            | -2,70%       |
| 14  | 40 | Odoribactersplanchnicus                   | 0,1234         | 39,7250       | 0,2911            | -2,52%       |
| 32  | 41 | Bacteroidesuniformis                      | 0,1144         | 40,1500       | 0,2838            | -1,02%       |
| 4   | 42 | Eubacteriumrectale                        | 0,1406         | 46,4750       | 0,2809            | -0,02%       |
| 100 | 43 | Clostridiumhathewayi                      | 0,1793         | 54,5250       | 0,2808            | -3,62%       |
| 61  | 44 | Bacteroidessp4136                         | 0,1246         | 46,3500       | 0,2707            | -1,39%       |
| 102 | 45 | Holdemaniafiliformis                      | 0,1117         | 44,8500       | 0,2669            | -0,79%       |
| 101 | 46 | Eubacteriumlimosum                        | 0,1313         | 49,5750       | 0,2648            | -1,14%       |
| 104 | 47 | Paludibacterpropionigenes                 | 0,1254         | 49,2750       | 0,2618            | -0,30%       |
| 93  | 48 | Clostridiumymbiosum                       | 0,1502         | 54,6750       | 0,2610            | -0,30%       |
| 103 | 49 | unculturedorganism                        | 0,1164         | 47,9000       | 0,2602            | -0,19%       |
| 86  | 50 | Bacteroidessp3133FAA                      | 0,1130         | 47,3500       | 0,2597            | -4,71%       |
| 49  | 51 | Prevotellamelaninogenica                  | 0,1051         | 49,5250       | 0,2475            | -0,15%       |
| 6   | 52 | Parabacteroidesdistasonis                 | 0,1091         | 50,4750       | 0,2471            | -0,69%       |
| 53  | 53 | Prevotelladenticola                       | 0,1044         | 50,0250       | 0,2454            | -1,28%       |
| 62  | 54 | butyrate_producingbacteriumSM4_1          | 0,1716         | 64,9500       | 0,2423            | -1,15%       |
| 74  | 55 | Prevotellaintermedia                      | 0,1050         | 52,0000       | 0,2395            | -0,07%       |
| 56  | 56 | butyrate_producingbacteriumSSC_2          | 0,1024         | 51,5000       | 0,2393            | -2,52%       |
| 92  | 57 | Butyrivibrioproteoclasticus               | 0,1084         | 54,6250       | 0,2333            | -0,07%       |
| 28  | 58 | Bacteroideseggerthii                      | 0,1119         | 55,4000       | 0,2331            | -3,24%       |
| 80  | 59 | ClostridiumspSY8519                       | 0,1062         | 56,5750       | 0,2255            | -2,92%       |
| 65  | 60 | Lachnospiraceabacterium3157FAACT1         | 0,1009         | 57,5250       | 0,2189            | -1,87%       |
| 84  | 61 | Anaerotruncuscolihominis                  | 0,0996         | 58,5250       | 0,2149            | -2,03%       |
| 63  | 62 | X_Eubacterium_cylindroides                | 0,1023         | 60,4500       | 0,2105            | -0,64%       |

Supplementary Table 3B (continued)

|     |     |                                     |        |          |        |         |
|-----|-----|-------------------------------------|--------|----------|--------|---------|
| 23  | 63  | Roseburia hominis                   | 0,0939 | 59,1250  | 0,2092 | -0,24%  |
| 57  | 64  | Ruminococcus albus                  | 0,0997 | 60,4750  | 0,2087 | -3,58%  |
| 19  | 65  | Eubacterium siraeum                 | 0,0951 | 61,8500  | 0,2012 | -1,50%  |
| 17  | 66  | Bacteroides salanitronis            | 0,1555 | 75,3250  | 0,1982 | -0,91%  |
| 2   | 67  | Faecalibacterium prausnitzii        | 0,0850 | 61,2500  | 0,1964 | -0,77%  |
| 78  | 68  | Coprococcus comes                   | 0,1183 | 68,6250  | 0,1949 | -2,40%  |
| 1   | 69  | Bacteroides vulgatus                | 0,0814 | 62,4250  | 0,1902 | -0,12%  |
| 106 | 70  | Dorea longicatena                   | 0,0947 | 65,2500  | 0,1900 | -0,14%  |
| 91  | 71  | Bacteroides sp3140A                 | 0,1003 | 66,5000  | 0,1897 | -3,54%  |
| 94  | 72  | Porphyromonas gingivalis            | 0,0835 | 65,1000  | 0,1830 | -5,40%  |
| 68  | 73  | Escherichia coli                    | 0,0836 | 68,2000  | 0,1731 | -0,28%  |
| 46  | 74  | Paraprevotella xylaniphila          | 0,0754 | 66,6500  | 0,1726 | -7,80%  |
| 9   | 75  | Alistipes shahii                    | 0,0787 | 71,5250  | 0,1592 | -1,61%  |
| 96  | 76  | Bacteroides clarus                  | 0,0744 | 71,4250  | 0,1566 | -3,29%  |
| 7   | 77  | Bacteroides fragilis                | 0,0691 | 71,9250  | 0,1514 | -0,21%  |
| 18  | 78  | Ruminococcus bromii                 | 0,0741 | 73,0750  | 0,1511 | -2,59%  |
| 95  | 79  | Clostridium bacterium 1747FAA       | 0,0767 | 74,8250  | 0,1472 | -7,68%  |
| 25  | 80  | Bacteroides spD20                   | 0,0661 | 76,1500  | 0,1359 | -1,60%  |
| 85  | 81  | Bacteroides fluxus                  | 0,0747 | 78,6000  | 0,1337 | -1,55%  |
| 87  | 82  | Bacteroides sp224                   | 0,0738 | 79,0750  | 0,1316 | -0,50%  |
| 5   | 83  | Bacteroides thetaiotaomicron        | 0,0662 | 77,7000  | 0,1310 | -1,14%  |
| 42  | 84  | Dialister invisus                   | 0,0631 | 77,5250  | 0,1295 | -0,76%  |
| 48  | 85  | Bacteroides dorei                   | 0,0677 | 78,7750  | 0,1285 | -1,04%  |
| 30  | 86  | Clostridium saccharolyticum         | 0,0673 | 79,1250  | 0,1272 | -5,13%  |
| 70  | 87  | Bacteroides sp9142FAA               | 0,0676 | 81,2000  | 0,1206 | -7,85%  |
| 41  | 88  | Bacteroides cellulosilyticus        | 0,0682 | 84,2750  | 0,1112 | -3,77%  |
| 47  | 89  | Phascolarctobacterium succinatutens | 0,0665 | 85,2250  | 0,1070 | -0,46%  |
| 99  | 90  | Desulfovibrio vulgaris              | 0,0648 | 85,0250  | 0,1065 | -2,18%  |
| 55  | 91  | Bilophila wadsworthia               | 0,0655 | 85,9000  | 0,1042 | -0,32%  |
| 77  | 92  | Clostridium asparagiforme           | 0,0669 | 86,3000  | 0,1038 | -1,31%  |
| 83  | 93  | Acidaminococcus fermentans          | 0,0617 | 85,6500  | 0,1025 | -0,08%  |
| 29  | 94  | Bifidobacterium adolescentis        | 0,0660 | 86,5500  | 0,1024 | -1,39%  |
| 39  | 95  | Coprococcus spART55_1               | 0,0653 | 86,8500  | 0,1010 | -0,13%  |
| 72  | 96  | Bacteroides finegoldii              | 0,0622 | 86,2500  | 0,1008 | -0,49%  |
| 97  | 97  | Parabacteroides johnsonii           | 0,0641 | 86,8000  | 0,1003 | -13,41% |
| 10  | 98  | Bacteroides helcogenes              | 0,0600 | 90,1250  | 0,0869 | -0,36%  |
| 3   | 99  | Bacteroides xylanisolvens           | 0,0641 | 91,0750  | 0,0866 | -0,22%  |
| 24  | 100 | Ruminococcus spSR1_5                | 0,0644 | 91,2000  | 0,0864 | -1,12%  |
| 50  | 101 | Sutterella wadsworthensis           | 0,0634 | 91,3000  | 0,0854 | -13,47% |
| 81  | 102 | Desulfovibrio desulfuricans         | 0,0600 | 94,1750  | 0,0739 | -5,73%  |
| 27  | 103 | Bacteroides plebeius                | 0,0568 | 94,8250  | 0,0697 | -4,55%  |
| 38  | 104 | Acidaminococcus intestinalis        | 0,0577 | 96,0000  | 0,0665 | -20,01% |
| 105 | 105 | Bacteroides sp116                   | 0,0557 | 99,7250  | 0,0532 | -27,61% |
| 60  | 106 | Bacteroides sp1114                  | 0,0529 | 103,7250 | 0,0385 |         |



# Supplementary Table S4A

Number of terms, degrees of freedom (df), AICc, adjusted  $R^2$  and relative standard error of the optimal linear regression models with one to five terms containing proportions of genera as predictor variables for both delta BMI (left) and RWL (right).

Mean squared errors and  $R^2$ -values were estimated for an independent test data set by performing a cross-validation on the original data set with 3, 5, 8 and 15 folds, and calculating mean squared errors and  $R^2$ -values from the averaged predictions.

| Predictor variables                   | delta BMI        |                  |                  |                  |                                |
|---------------------------------------|------------------|------------------|------------------|------------------|--------------------------------|
|                                       | Symbio-bacterium | Mega-sphaera     | Marvin-bryantia  | Blautia          | Blautia                        |
|                                       |                  | Symbio-bacterium | Mega-sphaera     | Marvin-bryantia  | Marvin-bryantia                |
|                                       |                  |                  | Symbio-bacterium | Mega-sphaera     | Mega-sphaera                   |
|                                       |                  |                  |                  | Symbio-bacterium | Oscillibacter Symbio-bacterium |
| number of terms                       | 1                | 2                | 3                | 4                | 5                              |
| df                                    | 3                | 4                | 5                | 6                | 7                              |
| AICc                                  | 90,1             | 81,1             | 77,2             | 74,9             | 77,8                           |
| adjusted $R^2$                        | 0,1985           | 0,6297           | 0,7722           | 0,8539           | 0,8803                         |
| relative standard error               | 47,32%           | 24,89%           | 34,28%           | 37,40%           | 29,27%                         |
|                                       |                  | 24,09%           | 21,45%           | 22,13%           | 21,24%                         |
|                                       |                  |                  | 16,65%           | 20,73%           | 17,79%                         |
|                                       |                  |                  |                  | 12,65%           | 55,85%                         |
|                                       |                  |                  |                  |                  | 21,18%                         |
| mean squared error                    | 13,74            | 5,86             | 3,30             | 1,93             | 1,42                           |
| mean squared error from CV / 3 folds  | 18,21            | 34,86            | 13,78            | 5,65             | 6,42                           |
| mean squared error from CV / 5 folds  | 18,09            | 34,77            | 14,54            | 5,89             | 6,61                           |
| mean squared error from CV / 8 folds  | 18,19            | 35,24            | 14,73            | 6,01             | 6,52                           |
| mean squared error from CV / 15 folds | 18,11            | 34,96            | 14,79            | 6,09             | 6,63                           |
| $R^2$                                 | 0,2557           | 0,6826           | 0,8210           | 0,8956           | 0,9230                         |
| $R^2$ from CV / 3 folds               | N/A              | N/A              | 0,2535           | 0,6942           | 0,6525                         |
| $R^2$ from CV / 5 folds               | N/A              | N/A              | 0,2126           | 0,6808           | 0,6423                         |
| $R^2$ from CV / 8 folds               | N/A              | N/A              | 0,2022           | 0,6743           | 0,6469                         |
| $R^2$ from CV / 15 folds              | N/A              | N/A              | 0,1989           | 0,6700           | 0,6411                         |

| Predictor variables                   | RWL              |                  |                  |                  |                                |
|---------------------------------------|------------------|------------------|------------------|------------------|--------------------------------|
|                                       | Symbio-bacterium | Mega-sphaera     | Marvin-bryantia  | Blautia          | Blautia                        |
|                                       |                  | Symbio-bacterium | Mega-sphaera     | Marvin-bryantia  | Marvin-bryantia                |
|                                       |                  |                  | Symbio-bacterium | Mega-sphaera     | Mega-sphaera                   |
|                                       |                  |                  |                  | Symbio-bacterium | Oscillibacter Symbio-bacterium |
| number of terms                       | 1                | 2                | 3                | 4                | 5                              |
| df                                    | 3                | 4                | 5                | 6                | 7                              |
| AICc                                  | 114,7            | 103,9            | 100,3            | 101,2            | 105,9                          |
| adjusted $R^2$                        | 0,2956           | 0,7129           | 0,8194           | 0,8574           | 0,8682                         |
| relative standard error               | 38,14%           | 22,42%           | 35,19%           | 50,43%           | 41,25%                         |
|                                       |                  | 19,10%           | 19,35%           | 26,67%           | 27,13%                         |
|                                       |                  |                  | 14,23%           | 23,85%           | 21,91%                         |
|                                       |                  |                  |                  | 12,27%           | 74,13%                         |
|                                       |                  |                  |                  |                  | 23,71%                         |
| mean squared error                    | 71,21            | 26,79            | 15,45            | 11,09            | 9,22                           |
| mean squared error from CV / 3 folds  | 92,31            | 155,65           | 67,51            | 33,75            | 30,88                          |
| mean squared error from CV / 5 folds  | 92,72            | 155,49           | 67,58            | 34,08            | 31,71                          |
| mean squared error from CV / 8 folds  | 92,31            | 157,09           | 67,85            | 34,17            | 31,87                          |
| mean squared error from CV / 15 folds | 92,35            | 155,32           | 65,88            | 33,79            | 32,05                          |
| $R^2$                                 | 0,3459           | 0,7539           | 0,8581           | 0,8981           | 0,9153                         |
| $R^2$ from CV / 3 folds               | N/A              | N/A              | 0,3798           | 0,6900           | 0,7163                         |
| $R^2$ from CV / 5 folds               | N/A              | N/A              | 0,3792           | 0,6869           | 0,7087                         |
| $R^2$ from CV / 8 folds               | N/A              | N/A              | 0,3767           | 0,6861           | 0,7072                         |
| $R^2$ from CV / 15 folds              | N/A              | N/A              | 0,3949           | 0,6896           | 0,7056                         |

# Supplementary Table S4B

Number of terms, degrees of freedom (df), AICc, adjusted  $R^2$  and relative standard error of the optimal linear regression models with one to five terms containing proportions of species as predictor variables for both delta BMI (left) and RWL (right).

Mean squared errors and  $R^2$ -values were estimated for an independent test data set by performing a cross-validation on the original data set with 3, 5, 8 and 15 folds, and calculating mean squared errors and  $R^2$ -values from the averaged predictions.

| Predictor variables                   | delta BMI            |                                            |                                                                      |                                                                                               |                                                                                                                   |
|---------------------------------------|----------------------|--------------------------------------------|----------------------------------------------------------------------|-----------------------------------------------------------------------------------------------|-------------------------------------------------------------------------------------------------------------------|
|                                       | Alistipes finegoldii | Alistipes finegoldii<br>Bacteroides caccae | Alistipes finegoldii<br>Bacteroides caccae<br>Roseburia intestinalis | Alistipes finegoldii<br>Bacteroides caccae<br>Bacteroides stercoris<br>Roseburia intestinalis | Alistipes finegoldii<br>Alistipes spHGB5<br>Bacteroides caccae<br>Bacteroides stercoris<br>Roseburia intestinalis |
| number of terms                       | 1                    | 2                                          | 3                                                                    | 4                                                                                             | 5                                                                                                                 |
| df                                    | 3                    | 4                                          | 5                                                                    | 6                                                                                             | 7                                                                                                                 |
| AICc                                  | 87,3                 | 78,7                                       | 71,9                                                                 | 66,8                                                                                          | 72,6                                                                                                              |
| adjusted $R^2$                        | 0,3348               | 0,6843                                     | 0,8394                                                               | 0,9148                                                                                        | 0,9156                                                                                                            |
| relative standard error               | 35,25%               | 20,59%<br>25,49%                           | 14,57%<br>16,02%<br>28,18%                                           | 12,21%<br>11,34%<br>30,54%<br>19,12%                                                          | 40,44%<br>95,36%<br>12,93%<br>29,85%<br>18,73%                                                                    |
| mean squared error                    | 11,41                | 5,00                                       | 2,33                                                                 | 1,12                                                                                          | 1,00                                                                                                              |
| mean squared error from CV / 3 folds  | 16,85                | 7,04                                       | 4,47                                                                 | 3,74                                                                                          | 4,88                                                                                                              |
| mean squared error from CV / 5 folds  | 17,17                | 6,79                                       | 3,95                                                                 | 3,70                                                                                          | 4,13                                                                                                              |
| mean squared error from CV / 8 folds  | 17,21                | 6,69                                       | 3,87                                                                 | 3,68                                                                                          | 4,71                                                                                                              |
| mean squared error from CV / 15 folds | 17,24                | 6,67                                       | 3,90                                                                 | 3,74                                                                                          | 5,58                                                                                                              |
| $R^2$                                 | 0,3823               | 0,7294                                     | 0,8738                                                               | 0,9391                                                                                        | 0,9457                                                                                                            |
| $R^2$ from CV / 3 folds               | N/A                  | 0,6188                                     | 0,7577                                                               | 0,7975                                                                                        | 0,7358                                                                                                            |
| $R^2$ from CV / 5 folds               | N/A                  | 0,6326                                     | 0,7862                                                               | 0,7997                                                                                        | 0,7763                                                                                                            |
| $R^2$ from CV / 8 folds               | N/A                  | 0,6377                                     | 0,7906                                                               | 0,8005                                                                                        | 0,7452                                                                                                            |
| $R^2$ from CV / 15 folds              | N/A                  | 0,6388                                     | 0,7887                                                               | 0,7975                                                                                        | 0,6977                                                                                                            |

  

| Predictor variables                   | RWL                  |                                            |                                                                      |                                                                                               |                                                                                                                        |
|---------------------------------------|----------------------|--------------------------------------------|----------------------------------------------------------------------|-----------------------------------------------------------------------------------------------|------------------------------------------------------------------------------------------------------------------------|
|                                       | Alistipes finegoldii | Alistipes finegoldii<br>Bacteroides caccae | Alistipes finegoldii<br>Bacteroides caccae<br>Roseburia intestinalis | Alistipes finegoldii<br>Bacteroides caccae<br>Bacteroides stercoris<br>Roseburia intestinalis | Alistipes finegoldii<br>Bacteroides caccae<br>Bacteroides stercoris<br>Ethanolog. harbinense<br>Roseburia intestinalis |
| number of terms                       | 1                    | 2                                          | 3                                                                    | 4                                                                                             | 5                                                                                                                      |
| df                                    | 3                    | 4                                          | 5                                                                    | 6                                                                                             | 7                                                                                                                      |
| AICc                                  | 114,7                | 106,4                                      | 99,4                                                                 | 91                                                                                            | 95,9                                                                                                                   |
| adjusted $R^2$                        | 0,2955               | 0,6599                                     | 0,8304                                                               | 0,9273                                                                                        | 0,9323                                                                                                                 |
| relative standard error               | 38,15%               | 22,18%<br>25,88%                           | 15,54%<br>16,05%<br>27,67%                                           | 11,90%<br>10,18%<br>25,26%<br>16,78%                                                          | 12,25%<br>10,68%<br>32,15%<br>75,74%<br>18,43%                                                                         |
| mean squared error                    | 71,22                | 31,74                                      | 14,51                                                                | 5,65                                                                                          | 4,73                                                                                                                   |
| mean squared error from CV / 3 folds  | 105,70               | 43,40                                      | 24,41                                                                | 16,70                                                                                         | 15,74                                                                                                                  |
| mean squared error from CV / 5 folds  | 106,59               | 43,08                                      | 22,74                                                                | 17,50                                                                                         | 15,82                                                                                                                  |
| mean squared error from CV / 8 folds  | 107,37               | 42,56                                      | 22,45                                                                | 17,98                                                                                         | 16,61                                                                                                                  |
| mean squared error from CV / 15 folds | 107,76               | 42,29                                      | 23,00                                                                | 18,47                                                                                         | 17,46                                                                                                                  |
| $R^2$                                 | 0,3458               | 0,7085                                     | 0,8667                                                               | 0,9481                                                                                        | 0,9565                                                                                                                 |
| $R^2$ from CV / 3 folds               | N/A                  | 0,6014                                     | 0,7758                                                               | 0,8466                                                                                        | 0,8554                                                                                                                 |
| $R^2$ from CV / 5 folds               | N/A                  | 0,6042                                     | 0,7911                                                               | 0,8393                                                                                        | 0,8547                                                                                                                 |
| $R^2$ from CV / 8 folds               | N/A                  | 0,6090                                     | 0,7938                                                               | 0,8348                                                                                        | 0,8474                                                                                                                 |
| $R^2$ from CV / 15 folds              | N/A                  | 0,6115                                     | 0,7887                                                               | 0,8303                                                                                        | 0,8396                                                                                                                 |

Supplementary Table S5A

Predicted weight loss, calculated as delta BMI, including classification and relative as well as absolute deviations of the predicted weight loss to the observed weight loss. Values are calculated for each patient under the optimal linear regression models with one to five linear terms containing predictor variables from the final set of selected genera of Table 6. Predictions for patients, numbered from 1 – 15 were classified as “correct(+)” in case significant weight loss occurred and was predicted, as “correct(-)” in case significant weight loss did not occur and was predicted as not occurring, as “overpredicted” in case a model predicted significant weight loss but it did not occur, and as “underpredicted” in case a model predicted no significant weight loss but significant weight loss occurred. The threshold for a significant weight loss was chosen as 4.8 in case of delta BMI.

Absolute deviations are the differences between predicted and observed BMI.

Relative deviations are absolute deviations divided by observed BMI.

| DS | ID   | Experimental deltaBMI | Predicted deltaBMI<br>1 term model | Predicted deltaBMI<br>2 terms model | Predicted deltaBMI<br>3 terms model | Predicted deltaBMI<br>4 terms model | Predicted deltaBMI<br>5 terms model |
|----|------|-----------------------|------------------------------------|-------------------------------------|-------------------------------------|-------------------------------------|-------------------------------------|
| 1  | AS44 | 3,493755              | 0,958803                           | 1,748966                            | 2,891745                            | 3,231218                            | 3,566491                            |
| 2  | AS45 | -4,162065             | 3,934257                           | -6,030012                           | -4,841759                           | -4,143036                           | -4,032864                           |
| 3  | AS50 | 5,497006              | 2,105900                           | 3,574203                            | 4,355042                            | 3,805976                            | 3,970089                            |
| 4  | AS51 | 0,730460              | 2,302431                           | 3,179765                            | 0,881268                            | 0,568658                            | 0,076206                            |
| 5  | AS53 | -4,514210             | 0,878587                           | 0,177932                            | -2,753783                           | -3,481998                           | -2,610879                           |
| 6  | AS56 | 7,136672              | 4,225984                           | 6,331825                            | 8,082186                            | 8,429783                            | 8,940461                            |
| 7  | AS58 | 4,577500              | 2,751644                           | 2,911705                            | 0,974659                            | 3,203305                            | 3,291153                            |
| 8  | AS60 | 8,923260              | 5,084506                           | 5,844778                            | 6,491457                            | 7,205909                            | 7,684455                            |
| 9  | AS61 | 5,119567              | 7,784050                           | 6,766043                            | 5,481692                            | 2,962458                            | 3,545577                            |
| 10 | AS62 | 5,900277              | 5,655660                           | 6,594179                            | 5,510664                            | 6,009453                            | 5,730281                            |
| 11 | AS63 | 3,689796              | 3,963359                           | 4,830592                            | 5,980822                            | 4,491976                            | 5,102556                            |
| 12 | AS64 | 5,607585              | 2,282377                           | 3,728585                            | 4,431196                            | 5,133634                            | 5,079464                            |
| 13 | AS65 | -1,212121             | 1,648666                           | 1,161091                            | 2,362797                            | 0,721703                            | -1,263880                           |
| 14 | AS66 | 4,996348              | 7,738965                           | 8,379718                            | 6,948426                            | 7,993532                            | 6,905266                            |
| 15 | AS68 | 11,423324             | 5,891541                           | 8,007625                            | 10,410287                           | 11,074314                           | 11,223004                           |

|    |      |                          |                                            |                                             | deltaBMI                                    | threshold:                                  | 4,8                                         |
|----|------|--------------------------|--------------------------------------------|---------------------------------------------|---------------------------------------------|---------------------------------------------|---------------------------------------------|
| DS | ID   | Experimental<br>deltaBMI | Classification<br>deltaBMI<br>1 term model | Classification<br>deltaBMI<br>2 terms model | Classification<br>deltaBMI<br>3 terms model | Classification<br>deltaBMI<br>4 terms model | Classification<br>deltaBMI<br>5 terms model |
| 1  | AS44 | 3,493755                 | correct(-)                                 | correct(-)                                  | correct(-)                                  | correct(-)                                  | correct(-)                                  |
| 2  | AS45 | -4,162065                | correct(-)                                 | correct(-)                                  | correct(-)                                  | correct(-)                                  | correct(-)                                  |
| 3  | AS50 | 5,497006                 | underpredicted                             | underpredicted                              | underpredicted                              | underpredicted                              | underpredicted                              |
| 4  | AS51 | 0,730460                 | correct(-)                                 | correct(-)                                  | correct(-)                                  | correct(-)                                  | correct(-)                                  |
| 5  | AS53 | -4,514210                | correct(-)                                 | correct(-)                                  | correct(-)                                  | correct(-)                                  | correct(-)                                  |
| 6  | AS56 | 7,136672                 | underpredicted                             | correct(+)                                  | correct(+)                                  | correct(+)                                  | correct(+)                                  |
| 7  | AS58 | 4,577500                 | correct(-)                                 | correct(-)                                  | correct(-)                                  | correct(-)                                  | correct(-)                                  |
| 8  | AS60 | 8,923260                 | correct(+)                                 | correct(+)                                  | correct(+)                                  | correct(+)                                  | correct(+)                                  |
| 9  | AS61 | 5,119567                 | correct(+)                                 | correct(+)                                  | correct(+)                                  | underpredicted                              | underpredicted                              |
| 10 | AS62 | 5,900277                 | correct(+)                                 | correct(+)                                  | correct(+)                                  | correct(+)                                  | correct(+)                                  |
| 11 | AS63 | 3,689796                 | correct(-)                                 | overpredicted                               | overpredicted                               | correct(-)                                  | overpredicted                               |
| 12 | AS64 | 5,607585                 | underpredicted                             | underpredicted                              | underpredicted                              | correct(+)                                  | correct(+)                                  |
| 13 | AS65 | -1,212121                | correct(-)                                 | correct(-)                                  | correct(-)                                  | correct(-)                                  | correct(-)                                  |
| 14 | AS66 | 4,996348                 | correct(+)                                 | correct(+)                                  | correct(+)                                  | correct(+)                                  | correct(+)                                  |
| 15 | AS68 | 11,423324                | correct(+)                                 | correct(+)                                  | correct(+)                                  | correct(+)                                  | correct(+)                                  |
|    |      | correct(+)               | 5                                          | 6                                           | 6                                           | 6                                           | 6                                           |
|    |      | correct(-)               | 7                                          | 6                                           | 6                                           | 7                                           | 6                                           |
|    |      | underpredicted           | 3                                          | 2                                           | 2                                           | 2                                           | 2                                           |
|    |      | overpredicted            | 0                                          | 1                                           | 1                                           | 0                                           | 1                                           |
|    |      | sum correct              | 12                                         | 12                                          | 12                                          | 13                                          | 12                                          |
|    |      | sum incorrect            | 3                                          | 3                                           | 3                                           | 2                                           | 3                                           |

| DS | ID   | Experimental deltaBMI | Abs. deviation deltaBMI<br>1 term model | Abs. deviation deltaBMI<br>2 terms model | Abs. deviation deltaBMI<br>3 terms model | Abs. deviation deltaBMI<br>4 terms model | Abs. deviation deltaBMI<br>5 terms model |
|----|------|-----------------------|-----------------------------------------|------------------------------------------|------------------------------------------|------------------------------------------|------------------------------------------|
| 1  | AS44 | 3,493755              | -2,5350                                 | -1,7448                                  | -0,6020                                  | -0,2625                                  | 0,0727                                   |
| 2  | AS45 | -4,162065             | 8,0963                                  | -1,8679                                  | -0,6797                                  | 0,0190                                   | 0,1292                                   |
| 3  | AS50 | 5,497006              | -3,3911                                 | -1,9228                                  | -1,1420                                  | -1,6910                                  | -1,5269                                  |
| 4  | AS51 | 0,730460              | 1,5720                                  | 2,4493                                   | 0,1508                                   | -0,1618                                  | -0,6543                                  |
| 5  | AS53 | -4,514210             | 5,3928                                  | 4,6921                                   | 1,7604                                   | 1,0322                                   | 1,9033                                   |
| 6  | AS56 | 7,136672              | -2,9107                                 | -0,8048                                  | 0,9455                                   | 1,2931                                   | 1,8038                                   |
| 7  | AS58 | 4,577500              | -1,8259                                 | -1,6658                                  | -3,6028                                  | -1,3742                                  | -1,2863                                  |
| 8  | AS60 | 8,923260              | -3,8388                                 | -3,0785                                  | -2,4318                                  | -1,7174                                  | -1,2388                                  |
| 9  | AS61 | 5,119567              | 2,6645                                  | 1,6465                                   | 0,3621                                   | -2,1571                                  | -1,5740                                  |
| 10 | AS62 | 5,900277              | -0,2446                                 | 0,6939                                   | -0,3896                                  | 0,1092                                   | -0,1700                                  |
| 11 | AS63 | 3,689796              | 0,2736                                  | 1,1408                                   | 2,2910                                   | 0,8022                                   | 1,4128                                   |
| 12 | AS64 | 5,607585              | -3,3252                                 | -1,8790                                  | -1,1764                                  | -0,4740                                  | -0,5281                                  |
| 13 | AS65 | -1,212121             | 2,8608                                  | 2,3732                                   | 3,5749                                   | 1,9338                                   | -0,0518                                  |
| 14 | AS66 | 4,996348              | 2,7426                                  | 3,3834                                   | 1,9521                                   | 2,9972                                   | 1,9089                                   |

Supplementary Table S5A (continued)

|    |      |                  |         |         |         |         |         |
|----|------|------------------|---------|---------|---------|---------|---------|
| 15 | AS68 | 11,423324        | -5,5318 | -3,4157 | -1,0130 | -0,3490 | -0,2003 |
|    |      | (min)            | -5,5318 | -3,4157 | -3,6028 | -2,1571 | -1,5740 |
|    |      | (mean neg. dev.) | -2,9504 | -2,0474 | -1,3797 | -1,0234 | -0,8034 |
|    |      | (mean pos. dev.) | 3,3718  | 2,3399  | 1,5767  | 1,1695  | 1,2051  |
|    |      | (max)            | 8,0963  | 4,6921  | 3,5749  | 2,9972  | 1,9089  |

  

| DS | ID   | Experimental<br>deltaBMI | Rel. deviation<br>deltaBMI<br>1 term model | Rel. deviation<br>deltaBMI<br>2 terms model | Rel. deviation<br>deltaBMI<br>3 terms model | Rel. deviation<br>deltaBMI<br>4 terms model | Rel. deviation<br>deltaBMI<br>5 terms model |
|----|------|--------------------------|--------------------------------------------|---------------------------------------------|---------------------------------------------|---------------------------------------------|---------------------------------------------|
| 1  | AS44 | 3,493755                 | -72,56%                                    | -49,94%                                     | -17,23%                                     | -7,51%                                      | 2,08%                                       |
| 2  | AS45 | -4,162065                | -194,53%                                   | 44,88%                                      | 16,33%                                      | -0,46%                                      | -3,10%                                      |
| 3  | AS50 | 5,497006                 | -61,69%                                    | -34,98%                                     | -20,77%                                     | -30,76%                                     | -27,78%                                     |
| 4  | AS51 | 0,730460                 | 215,20%                                    | 335,31%                                     | 20,65%                                      | -22,15%                                     | -89,57%                                     |
| 5  | AS53 | -4,514210                | -119,46%                                   | -103,94%                                    | -39,00%                                     | -22,87%                                     | -42,16%                                     |
| 6  | AS56 | 7,136672                 | -40,78%                                    | -11,28%                                     | 13,25%                                      | 18,12%                                      | 25,27%                                      |
| 7  | AS58 | 4,577500                 | -39,89%                                    | -36,39%                                     | -78,71%                                     | -30,02%                                     | -28,10%                                     |
| 8  | AS60 | 8,923260                 | -43,02%                                    | -34,50%                                     | -27,25%                                     | -19,25%                                     | -13,88%                                     |
| 9  | AS61 | 5,119567                 | 52,05%                                     | 32,16%                                      | 7,07%                                       | -42,13%                                     | -30,74%                                     |
| 10 | AS62 | 5,900277                 | -4,15%                                     | 11,76%                                      | -6,60%                                      | 1,85%                                       | -2,88%                                      |
| 11 | AS63 | 3,689796                 | 7,41%                                      | 30,92%                                      | 62,09%                                      | 21,74%                                      | 38,29%                                      |
| 12 | AS64 | 5,607585                 | -59,30%                                    | -33,51%                                     | -20,98%                                     | -8,45%                                      | -9,42%                                      |
| 13 | AS65 | -1,212121                | -236,01%                                   | -195,79%                                    | -294,93%                                    | -159,54%                                    | 4,27%                                       |
| 14 | AS66 | 4,996348                 | 54,89%                                     | 67,72%                                      | 39,07%                                      | 59,99%                                      | 38,21%                                      |
| 15 | AS68 | 11,423324                | -48,43%                                    | -29,90%                                     | -8,87%                                      | -3,06%                                      | -1,75%                                      |
|    |      | (min)                    | -236,01%                                   | -195,79%                                    | -294,93%                                    | -159,54%                                    | -89,57%                                     |
|    |      | (mean neg. dev.)         | -83,62%                                    | -58,91%                                     | -57,15%                                     | -31,47%                                     | -24,94%                                     |
|    |      | (mean pos. dev.)         | 82,39%                                     | 87,12%                                      | 26,41%                                      | 25,42%                                      | 21,62%                                      |
|    |      | (max)                    | 215,20%                                    | 335,31%                                     | 62,09%                                      | 59,99%                                      | 38,29%                                      |

  

|                                | 1 term model          | 2 terms model                       | 3 terms model                                      | 4 terms model                                                  | 5 terms model                                                                 |
|--------------------------------|-----------------------|-------------------------------------|----------------------------------------------------|----------------------------------------------------------------|-------------------------------------------------------------------------------|
| df                             | 3                     | 4                                   | 5                                                  | 6                                                              | 7                                                                             |
| AICc                           | 90,1                  | 81,1                                | 77,2                                               | 74,9                                                           | 77,8                                                                          |
| $\sigma$                       | 3,9824                | 2,7067                              | 2,1228                                             | 1,7002                                                         | 1,5389                                                                        |
| adjusted R <sup>2</sup>        | 0,1985                | 0,6297                              | 0,7722                                             | 0,8539                                                         | 0,8803                                                                        |
| Predictor variables            | Symbiobacterium       | Megasphaera<br>Symbiobacterium      | Marvinbryantia<br>Megasphaera<br>Symbiobacterium   | Blautia<br>Marvinbryantia<br>Megasphaera<br>Symbiobacterium    | Blautia<br>Marvinbryantia<br>Megasphaera<br>Oscillibacter<br>Symbiobacterium  |
| Indices of predictor variables | 70                    | 43<br>70                            | 58<br>43<br>70                                     | 12<br>58<br>43<br>70                                           | 12<br>58<br>43<br>17<br>70                                                    |
| Terms (estimates)              | -0,4129<br>40108,2857 | 1,3943<br>-14712,3712<br>56023,4447 | 2,1548<br>-13801,3176<br>-13524,0523<br>78001,1437 | 2,3471<br>385,3526<br>-21318,3744<br>-27353,0537<br>84307,6324 | 2,9371<br>483,5248<br>-20286,0947<br>-30415,3579<br>-2275,6930<br>130818,0411 |
|                                |                       |                                     |                                                    |                                                                | $\beta_0$<br>$\beta_1$<br>$\beta_2$<br>$\beta_3$<br>$\beta_4$<br>$\beta_5$    |

## Supplementary Table S5B

Predicted weight loss, calculated as delta BMI, including classification and relative as well as absolute deviations of the predicted weight loss to the observed weight loss. Values are calculated for each patient under the optimal linear regression models with one to five linear terms containing predictor variables from the final set of selected species of Table 6. Predictions for patients, numbered from 1 – 15 were classified as “correct(+)” in case significant weight loss occurred and was predicted, as “correct(-)” in case significant weight loss did not occur and was predicted as not occurring, as “overpredicted” in case a model predicted significant weight loss but it did not occur, and as “underpredicted” in case a model predicted no significant weight loss but significant weight loss occurred. The threshold for a significant weight loss was chosen as 4.8 in case of delta BMI.

Absolute deviations are the differences between predicted and observed BMI.

Relative deviations are absolute deviations divided by observed BMI.

| DS | ID   | Experimental deltaBMI | Predicted deltaBMI<br>1 term model | Predicted deltaBMI<br>2 terms model | Predicted deltaBMI<br>3 terms model | Predicted deltaBMI<br>4 terms model | Predicted deltaBMI<br>5 terms model |
|----|------|-----------------------|------------------------------------|-------------------------------------|-------------------------------------|-------------------------------------|-------------------------------------|
| 1  | AS44 | 3,493755              | 1,209862                           | 0,556251                            | 1,569926                            | 2,605970                            | 2,722080                            |
| 2  | AS45 | -4,162065             | 2,003930                           | -4,430295                           | -4,548929                           | -4,199125                           | -4,863081                           |
| 3  | AS50 | 5,497006              | 2,348452                           | 3,249720                            | 4,581538                            | 5,365381                            | 5,594149                            |
| 4  | AS51 | 0,730460              | 1,520963                           | 1,824863                            | 2,265738                            | 0,436464                            | 0,556101                            |
| 5  | AS53 | -4,514210             | 0,997941                           | 1,143811                            | -3,825890                           | -3,480628                           | -3,546740                           |
| 6  | AS56 | 7,136672              | 5,820853                           | 7,733478                            | 8,407433                            | 8,891413                            | 8,757313                            |
| 7  | AS58 | 4,577500              | 1,642979                           | 2,382581                            | 2,851883                            | 3,823414                            | 4,001707                            |
| 8  | AS60 | 8,923260              | 7,838665                           | 10,406615                           | 7,490986                            | 7,355285                            | 7,475410                            |
| 9  | AS61 | 5,119567              | 5,126517                           | 5,546941                            | 5,957365                            | 6,532467                            | 6,160304                            |
| 10 | AS62 | 5,900277              | 3,947900                           | 4,426650                            | 5,112201                            | 5,754227                            | 5,572788                            |
| 11 | AS63 | 3,689796              | 9,372458                           | 3,704056                            | 3,700322                            | 3,428687                            | 4,072275                            |
| 12 | AS64 | 5,607585              | 3,636668                           | 5,004917                            | 5,494150                            | 3,705676                            | 3,647632                            |
| 13 | AS65 | -1,212121             | 2,203936                           | 2,332915                            | 2,968813                            | 0,435141                            | 0,421994                            |
| 14 | AS66 | 4,996348              | 1,726790                           | 2,923610                            | 3,602172                            | 4,631671                            | 5,245066                            |
| 15 | AS68 | 11,423324             | 7,809050                           | 10,400292                           | 11,579448                           | 11,920629                           | 11,390202                           |

| DS | ID   | Experimental deltaBMI | Classification<br>1 term model | Classification<br>2 terms model | Classification<br>3 terms model | Classification<br>4 terms model | Classification<br>5 terms model |
|----|------|-----------------------|--------------------------------|---------------------------------|---------------------------------|---------------------------------|---------------------------------|
| 1  | AS44 | 3,493755              | correct(-)                     | correct(-)                      | correct(-)                      | correct(-)                      | correct(-)                      |
| 2  | AS45 | -4,162065             | correct(-)                     | correct(-)                      | correct(-)                      | correct(-)                      | correct(-)                      |
| 3  | AS50 | 5,497006              | underpredicted                 | underpredicted                  | underpredicted                  | correct(+)                      | correct(+)                      |
| 4  | AS51 | 0,730460              | correct(-)                     | correct(-)                      | correct(-)                      | correct(-)                      | correct(-)                      |
| 5  | AS53 | -4,514210             | correct(-)                     | correct(-)                      | correct(-)                      | correct(-)                      | correct(-)                      |
| 6  | AS56 | 7,136672              | correct(+)                     | correct(+)                      | correct(+)                      | correct(+)                      | correct(+)                      |
| 7  | AS58 | 4,577500              | correct(-)                     | correct(-)                      | correct(-)                      | correct(-)                      | correct(-)                      |
| 8  | AS60 | 8,923260              | correct(+)                     | correct(+)                      | correct(+)                      | correct(+)                      | correct(+)                      |
| 9  | AS61 | 5,119567              | correct(+)                     | correct(+)                      | correct(+)                      | correct(+)                      | correct(+)                      |
| 10 | AS62 | 5,900277              | underpredicted                 | underpredicted                  | correct(+)                      | correct(+)                      | correct(+)                      |
| 11 | AS63 | 3,689796              | overpredicted                  | correct(-)                      | correct(-)                      | correct(-)                      | correct(-)                      |
| 12 | AS64 | 5,607585              | underpredicted                 | correct(+)                      | correct(+)                      | underpredicted                  | underpredicted                  |
| 13 | AS65 | -1,212121             | correct(-)                     | correct(-)                      | correct(-)                      | correct(-)                      | correct(-)                      |
| 14 | AS66 | 4,996348              | underpredicted                 | underpredicted                  | underpredicted                  | underpredicted                  | correct(+)                      |
| 15 | AS68 | 11,423324             | correct(+)                     | correct(+)                      | correct(+)                      | correct(+)                      | correct(+)                      |
|    |      | correct(+)            | 4                              | 5                               | 6                               | 6                               | 7                               |
|    |      | correct(-)            | 6                              | 7                               | 7                               | 7                               | 7                               |
|    |      | underpredicted        | 4                              | 3                               | 2                               | 2                               | 1                               |
|    |      | overpredicted         | 1                              | 0                               | 0                               | 0                               | 0                               |
|    |      | sum correct           | 10                             | 12                              | 13                              | 13                              | 14                              |
|    |      | sum incorrect         | 5                              | 3                               | 2                               | 2                               | 1                               |

| DS | ID   | Experimental deltaBMI | Abs. deviation<br>1 term model | Abs. deviation<br>2 terms model | Abs. deviation<br>3 terms model | Abs. deviation<br>4 terms model | Abs. deviation<br>5 terms model |
|----|------|-----------------------|--------------------------------|---------------------------------|---------------------------------|---------------------------------|---------------------------------|
| 1  | AS44 | 3,493755              | -2,2839                        | -2,9375                         | -1,9238                         | -0,8878                         | -0,7717                         |
| 2  | AS45 | -4,162065             | 6,1660                         | -0,2682                         | -0,3869                         | -0,0371                         | -0,7010                         |
| 3  | AS50 | 5,497006              | -3,1486                        | -2,2473                         | -0,9155                         | -0,1316                         | 0,0971                          |
| 4  | AS51 | 0,730460              | 0,7905                         | 1,0944                          | 1,5353                          | -0,2940                         | -0,1744                         |
| 5  | AS53 | -4,514210             | 5,5122                         | 5,6580                          | 0,6883                          | 1,0336                          | 0,9675                          |
| 6  | AS56 | 7,136672              | -1,3158                        | 0,5968                          | 1,2708                          | 1,7547                          | 1,6206                          |
| 7  | AS58 | 4,577500              | -2,9345                        | -2,1949                         | -1,7256                         | -0,7541                         | -0,5758                         |
| 8  | AS60 | 8,923260              | -1,0846                        | 1,4834                          | -1,4323                         | -1,5680                         | -1,4479                         |
| 9  | AS61 | 5,119567              | 0,0070                         | 0,4274                          | 0,8378                          | 1,4129                          | 1,0407                          |
| 10 | AS62 | 5,900277              | -1,9524                        | -1,4736                         | -0,7881                         | -0,1461                         | -0,3275                         |
| 11 | AS63 | 3,689796              | 5,6827                         | 0,0143                          | 0,0105                          | -0,2611                         | 0,3825                          |
| 12 | AS64 | 5,607585              | -1,9709                        | -0,6027                         | -0,1134                         | -1,9019                         | -1,9600                         |
| 13 | AS65 | -1,212121             | 3,4161                         | 3,5450                          | 4,1809                          | 1,6473                          | 1,6341                          |

Supplementary Table S5B (continued)

|    |      |                  |                |                |                |                |                |
|----|------|------------------|----------------|----------------|----------------|----------------|----------------|
| 14 | AS66 | 4,996348         | -3,2696        | -2,0727        | -1,3942        | -0,3647        | 0,2487         |
| 15 | AS68 | 11,423324        | -3,6143        | -1,0230        | 0,1561         | 0,4973         | -0,0331        |
|    |      | (min)            | <b>-3,6143</b> | <b>-2,9375</b> | <b>-1,9238</b> | <b>-1,9019</b> | <b>-1,9600</b> |
|    |      | (mean neg. dev.) | <b>-2,3972</b> | <b>-1,6025</b> | <b>-1,0850</b> | <b>-0,6346</b> | <b>-0,7489</b> |
|    |      | (mean pos. dev.) | <b>3,5957</b>  | <b>1,8313</b>  | <b>1,2400</b>  | <b>1,2692</b>  | <b>0,8559</b>  |
|    |      | (max)            | <b>6,1660</b>  | <b>5,6580</b>  | <b>4,1809</b>  | <b>1,7547</b>  | <b>1,6341</b>  |

| DS | ID      | Experimental<br>deltaBMI | Rel. deviation<br>deltaBMI<br>1 term model | Rel. deviation<br>deltaBMI<br>2 terms model | Rel. deviation<br>deltaBMI<br>3 terms model | Rel. deviation<br>deltaBMI<br>4 terms model | Rel. deviation<br>deltaBMI<br>5 terms model |
|----|---------|--------------------------|--------------------------------------------|---------------------------------------------|---------------------------------------------|---------------------------------------------|---------------------------------------------|
|    | 1 AS44  | 3,493755                 | -65,37%                                    | -84,08%                                     | -55,06%                                     | -25,41%                                     | -22,09%                                     |
|    | 2 AS45  | -4,162065                | -148,15%                                   | 6,44%                                       | 9,29%                                       | 0,89%                                       | 16,84%                                      |
|    | 3 AS50  | 5,497006                 | -57,28%                                    | -40,88%                                     | -16,65%                                     | -2,39%                                      | 1,77%                                       |
|    | 4 AS51  | 0,730460                 | 108,22%                                    | 149,82%                                     | 210,18%                                     | -40,25%                                     | -23,87%                                     |
|    | 5 AS53  | -4,514210                | -122,11%                                   | -125,34%                                    | -15,25%                                     | -22,90%                                     | -21,43%                                     |
|    | 6 AS56  | 7,136672                 | -18,44%                                    | 8,36%                                       | 17,81%                                      | 24,59%                                      | 22,71%                                      |
|    | 7 AS58  | 4,577500                 | -64,11%                                    | -47,95%                                     | -37,70%                                     | -16,47%                                     | -12,58%                                     |
|    | 8 AS60  | 8,923260                 | -12,15%                                    | 16,62%                                      | -16,05%                                     | -17,57%                                     | -16,23%                                     |
|    | 9 AS61  | 5,119567                 | 0,14%                                      | 8,35%                                       | 16,36%                                      | 27,60%                                      | 20,33%                                      |
|    | 10 AS62 | 5,900277                 | -33,09%                                    | -24,98%                                     | -13,36%                                     | -2,48%                                      | -5,55%                                      |
|    | 11 AS63 | 3,689796                 | 154,01%                                    | 0,39%                                       | 0,29%                                       | -7,08%                                      | 10,37%                                      |
|    | 12 AS64 | 5,607585                 | -35,15%                                    | -10,75%                                     | -2,02%                                      | -33,92%                                     | -34,95%                                     |
|    | 13 AS65 | -1,212121                | <b>-281,82%</b>                            | <b>-292,47%</b>                             | <b>-344,93%</b>                             | <b>-135,90%</b>                             | <b>-134,81%</b>                             |
|    | 14 AS66 | 4,996348                 | -65,44%                                    | -41,49%                                     | -27,90%                                     | -7,30%                                      | 4,98%                                       |
|    | 15 AS68 | 11,423324                | -31,64%                                    | -8,96%                                      | 1,37%                                       | 4,35%                                       | -0,29%                                      |
|    |         | (min)                    | <b>-281,82%</b>                            | <b>-292,47%</b>                             | <b>-344,93%</b>                             | <b>-135,90%</b>                             | <b>-134,81%</b>                             |
|    |         | (mean neg. dev.)         | <b>-77,90%</b>                             | <b>-75,21%</b>                              | <b>-58,77%</b>                              | <b>-28,33%</b>                              | <b>-30,20%</b>                              |
|    |         | (mean pos. dev.)         | <b>87,46%</b>                              | <b>31,66%</b>                               | <b>42,55%</b>                               | <b>14,36%</b>                               | <b>12,83%</b>                               |
|    |         | (max)                    | <b>154,01%</b>                             | <b>149,82%</b>                              | <b>210,18%</b>                              | <b>27,60%</b>                               | <b>22,71%</b>                               |

|                                      | 1 term model            | 2 terms model                                    | 3 terms model                                                                 | 4 terms model                                                                                             | 5 terms model                                                                                                                    |                                                                            |
|--------------------------------------|-------------------------|--------------------------------------------------|-------------------------------------------------------------------------------|-----------------------------------------------------------------------------------------------------------|----------------------------------------------------------------------------------------------------------------------------------|----------------------------------------------------------------------------|
| <i>df</i>                            | 3                       | 4                                                | 5                                                                             | 6                                                                                                         | 7                                                                                                                                |                                                                            |
| AICc                                 | 87,3                    | 78,7                                             | 71,9                                                                          | 66,8                                                                                                      | 72,6                                                                                                                             |                                                                            |
| $\sigma$                             | 3,6278                  | 2,4994                                           | 1,7824                                                                        | 1,2986                                                                                                    | 1,2922                                                                                                                           |                                                                            |
| adjusted R <sup>2</sup>              | 0,3348                  | 0,6843                                           | 0,8394                                                                        | 0,9148                                                                                                    | 0,9156                                                                                                                           |                                                                            |
| Predictor<br>variables               | Alistipes<br>finegoldii | Alistipes<br>finegoldii<br>Bacteroides<br>caccae | Alistipes<br>finegoldii<br>Bacteroides<br>caccae<br>Roseburia<br>intestinalis | Alistipes<br>finegoldii<br>Bacteroides<br>caccae<br>Bacteroides<br>stercoris<br>Roseburia<br>intestinalis | Alistipes<br>finegoldii<br>Alistipes<br>spHGB5<br>Bacteroides<br>caccae<br>Bacteroides<br>stercoris<br>Roseburia<br>intestinalis |                                                                            |
| Indices of<br>predictor<br>variables | 8                       | 8<br>59                                          | 8<br>59<br>12                                                                 | 8<br>59<br>40<br>12                                                                                       | 8<br>20<br>59<br>40<br>12                                                                                                        |                                                                            |
| Terms<br>(estimates)                 | 0,3472<br>182,8347      | 1,6915<br>220,7382<br>-982,1785                  | 3,2493<br>222,4464<br>-1155,4981<br>-53,0409                                  | 4,5817<br>200,8240<br>-1193,2381<br>-202,3671<br>-57,3845                                                 | 5,0939<br>144,9347<br>157,8646<br>-1298,3441<br>-206,3933<br>-60,7754                                                            | $\beta_0$<br>$\beta_1$<br>$\beta_2$<br>$\beta_3$<br>$\beta_4$<br>$\beta_5$ |



Supplementary Table S6A

Predicted weight loss, calculated as RWL, including classification and relative as well as absolute deviations of the predicted weight loss to the observed weight loss. Values are calculated for each patient under the optimal linear regression models with one to five linear terms containing predictor variables from the final set of selected genera of Table 6. Predictions for patients, numbered from 1 – 15 were classified as “correct(+)” in case significant weight loss occurred and was predicted, as “correct(-)” in case significant weight loss did not occur and was predicted as not occurring, as “overpredicted” in case a model predicted significant weight loss but it did not occur, and as “underpredicted” in case a model predicted no significant weight loss but significant weight loss occurred. The threshold for a significant weight loss was chosen as 10 in case of RWL.

Absolute deviations are the differences between predicted and RWL.

Relative deviations are absolute deviations divided by RWL.

| DS | ID   | Experimental RWL | Predicted RWL 1 term model | Predicted RWL 2 terms model | Predicted RWL 3 terms model | Predicted RWL 4 terms model | Predicted RWL 5 terms model |
|----|------|------------------|----------------------------|-----------------------------|-----------------------------|-----------------------------|-----------------------------|
| 1  | AS44 | 7,419621         | 1,308516                   | 3,184003                    | 5,591291                    | 6,195228                    | 6,838722                    |
| 2  | AS45 | -10,017575       | 9,710818                   | -13,940128                  | -11,437047                  | -10,193966                  | -9,982516                   |
| 3  | AS50 | 14,672897        | 4,547772                   | 8,032874                    | 9,677719                    | 8,700844                    | 9,015824                    |
| 4  | AS51 | 1,790831         | 5,102750                   | 7,185145                    | 2,343230                    | 1,787038                    | 0,841849                    |
| 5  | AS53 | -10,819672       | 1,081995                   | -0,581084                   | -6,756898                   | -8,052501                   | -6,380540                   |
| 6  | AS56 | 17,835821        | 10,534620                  | 15,532966                   | 19,220151                   | 19,838543                   | 20,818698                   |
| 7  | AS58 | 8,203593         | 6,371269                   | 6,751164                    | 2,670664                    | 6,635655                    | 6,804258                    |
| 8  | AS60 | 20,636285        | 12,958976                  | 14,763515                   | 16,125747                   | 17,396813                   | 18,315298                   |
| 9  | AS61 | 15,848671        | 20,582147                  | 18,165808                   | 15,460239                   | 10,978208                   | 12,097402                   |
| 10 | AS62 | 17,401961        | 14,571843                  | 16,799465                   | 14,516965                   | 15,404342                   | 14,868511                   |
| 11 | AS63 | 7,463672         | 9,793000                   | 11,851418                   | 14,274403                   | 11,625550                   | 12,797452                   |
| 12 | AS64 | 12,247475        | 5,046119                   | 8,478778                    | 9,958832                    | 11,208526                   | 11,104548                   |
| 13 | AS65 | -2,532617        | 3,256600                   | 2,099283                    | 4,630703                    | 1,710986                    | -2,100022                   |
| 14 | AS66 | 14,491525        | 20,454830                  | 21,975683                   | 18,960576                   | 20,819913                   | 18,731161                   |
| 15 | AS68 | 25,916667        | 15,237940                  | 20,260600                   | 25,321887                   | 26,503242                   | 26,788622                   |

| DS             | ID   | Experimental RWL | Classification RWL 1 term model | Classification RWL 2 terms model | Classification RWL 3 terms model | Classification RWL 4 terms model | Classification RWL 5 terms model |
|----------------|------|------------------|---------------------------------|----------------------------------|----------------------------------|----------------------------------|----------------------------------|
| 1              | AS44 | 7,419621         | correct(-)                      | correct(-)                       | correct(-)                       | correct(-)                       | correct(-)                       |
| 2              | AS45 | -10,017575       | correct(-)                      | correct(-)                       | correct(-)                       | correct(-)                       | correct(-)                       |
| 3              | AS50 | 14,672897        | underpredicted                  | underpredicted                   | underpredicted                   | underpredicted                   | underpredicted                   |
| 4              | AS51 | 1,790831         | correct(-)                      | correct(-)                       | correct(-)                       | correct(-)                       | correct(-)                       |
| 5              | AS53 | -10,819672       | correct(-)                      | correct(-)                       | correct(-)                       | correct(-)                       | correct(-)                       |
| 6              | AS56 | 17,835821        | correct(+)                      | correct(+)                       | correct(+)                       | correct(+)                       | correct(+)                       |
| 7              | AS58 | 8,203593         | correct(-)                      | correct(-)                       | correct(-)                       | correct(-)                       | correct(-)                       |
| 8              | AS60 | 20,636285        | correct(+)                      | correct(+)                       | correct(+)                       | correct(+)                       | correct(+)                       |
| 9              | AS61 | 15,848671        | correct(+)                      | correct(+)                       | correct(+)                       | correct(+)                       | correct(+)                       |
| 10             | AS62 | 17,401961        | correct(+)                      | correct(+)                       | correct(+)                       | correct(+)                       | correct(+)                       |
| 11             | AS63 | 7,463672         | correct(-)                      | overpredicted                    | overpredicted                    | overpredicted                    | overpredicted                    |
| 12             | AS64 | 12,247475        | underpredicted                  | underpredicted                   | underpredicted                   | correct(+)                       | correct(+)                       |
| 13             | AS65 | -2,532617        | correct(-)                      | correct(-)                       | correct(-)                       | correct(-)                       | correct(-)                       |
| 14             | AS66 | 14,491525        | correct(+)                      | correct(+)                       | correct(+)                       | correct(+)                       | correct(+)                       |
| 15             | AS68 | 25,916667        | correct(+)                      | correct(+)                       | correct(+)                       | correct(+)                       | correct(+)                       |
| correct(+)     |      |                  | 6                               | 6                                | 6                                | 7                                | 7                                |
| correct(-)     |      |                  | 7                               | 6                                | 6                                | 6                                | 6                                |
| underpredicted |      |                  | 2                               | 2                                | 2                                | 1                                | 1                                |
| overpredicted  |      |                  | 0                               | 1                                | 1                                | 1                                | 1                                |
| sum correct    |      |                  | 13                              | 12                               | 12                               | 13                               | 13                               |
| sum incorrect  |      |                  | 2                               | 3                                | 3                                | 2                                | 2                                |

| DS | ID   | Experimental RWL | Abs. deviation RWL 1 term model | Abs. deviation RWL 2 terms model | Abs. deviation RWL 3 terms model | Abs. deviation RWL 4 terms model | Abs. deviation RWL 5 terms model |
|----|------|------------------|---------------------------------|----------------------------------|----------------------------------|----------------------------------|----------------------------------|
| 1  | AS44 | 7,419621         | -6,1111                         | -4,2356                          | -1,8283                          | -1,2244                          | -0,5809                          |
| 2  | AS45 | -10,017575       | 19,7284                         | -3,9226                          | -1,4195                          | -0,1764                          | 0,0351                           |
| 3  | AS50 | 14,672897        | -10,1251                        | -6,6400                          | -4,9952                          | -5,9721                          | -5,6571                          |
| 4  | AS51 | 1,790831         | 3,3119                          | 5,3943                           | 0,5524                           | -0,0038                          | -0,9490                          |
| 5  | AS53 | -10,819672       | 11,9017                         | 10,2386                          | 4,0628                           | 2,7672                           | 4,4391                           |
| 6  | AS56 | 17,835821        | -7,3012                         | -2,3029                          | 1,3843                           | 2,0027                           | 2,9829                           |
| 7  | AS58 | 8,203593         | -1,8323                         | -1,4524                          | -5,5329                          | -1,5679                          | -1,3993                          |
| 8  | AS60 | 20,636285        | -7,6773                         | -5,8728                          | -4,5105                          | -3,2395                          | -2,3210                          |
| 9  | AS61 | 15,848671        | 4,7335                          | 2,3171                           | -0,3884                          | -4,8705                          | -3,7513                          |
| 10 | AS62 | 17,401961        | -2,8301                         | -0,6025                          | -2,8850                          | -1,9976                          | -2,5335                          |
| 11 | AS63 | 7,463672         | 2,3293                          | 4,3877                           | 6,8107                           | 4,1619                           | 5,3338                           |
| 12 | AS64 | 12,247475        | -7,2014                         | -3,7687                          | -2,2886                          | -1,0389                          | -1,1429                          |
| 13 | AS65 | -2,532617        | 5,7892                          | 4,6319                           | 7,1633                           | 4,2436                           | 0,4326                           |
| 14 | AS66 | 14,491525        | 5,9633                          | 7,4842                           | 4,4691                           | 6,3284                           | 4,2396                           |

Supplementary Table S6A (continued)

|    |      |                  |          |         |         |         |         |
|----|------|------------------|----------|---------|---------|---------|---------|
| 15 | AS68 | 25,916667        | -10,6787 | -5,6561 | -0,5948 | 0,5866  | 0,8720  |
|    |      | (min)            | -10,6787 | -6,6400 | -5,5329 | -5,9721 | -5,6571 |
|    |      | (mean neg. dev.) | -6,7197  | -3,8282 | -2,7159 | -2,2323 | -2,2919 |
|    |      | (mean pos. dev.) | 7,6796   | 5,7423  | 4,0738  | 3,3484  | 2,6193  |
|    |      | (max)            | 19,7284  | 10,2386 | 7,1633  | 6,3284  | 5,3338  |

| DS | ID   | Experimental<br>RWL | Rel. deviation<br>RWL<br>1 term model | Rel. deviation<br>RWL<br>2 terms model | Rel. deviation<br>RWL<br>3 terms model | Rel. deviation<br>RWL<br>4 terms model | Rel. deviation<br>RWL<br>5 terms model |
|----|------|---------------------|---------------------------------------|----------------------------------------|----------------------------------------|----------------------------------------|----------------------------------------|
| 1  | AS44 | 7,419621            | -82,36%                               | -57,09%                                | -24,64%                                | -16,50%                                | -7,83%                                 |
| 2  | AS45 | -10,017575          | -196,94%                              | 39,16%                                 | 14,17%                                 | 1,76%                                  | -0,35%                                 |
| 3  | AS50 | 14,672897           | -69,01%                               | -45,25%                                | -34,04%                                | -40,70%                                | -38,55%                                |
| 4  | AS51 | 1,790831            | 184,94%                               | 301,22%                                | 30,85%                                 | -0,21%                                 | -52,99%                                |
| 5  | AS53 | -10,819672          | -110,00%                              | -94,63%                                | -37,55%                                | -25,58%                                | -41,03%                                |
| 6  | AS56 | 17,835821           | -40,94%                               | -12,91%                                | 7,76%                                  | 11,23%                                 | 16,72%                                 |
| 7  | AS58 | 8,203593            | -22,34%                               | -17,70%                                | -67,45%                                | -19,11%                                | -17,06%                                |
| 8  | AS60 | 20,636285           | -37,20%                               | -28,46%                                | -21,86%                                | -15,70%                                | -11,25%                                |
| 9  | AS61 | 15,848671           | 29,87%                                | 14,62%                                 | -2,45%                                 | -30,73%                                | -23,67%                                |
| 10 | AS62 | 17,401961           | -16,26%                               | -3,46%                                 | -16,58%                                | -11,48%                                | -14,56%                                |
| 11 | AS63 | 7,463672            | 31,21%                                | 58,79%                                 | 91,25%                                 | 55,76%                                 | 71,46%                                 |
| 12 | AS64 | 12,247475           | -58,80%                               | -30,77%                                | -18,69%                                | -8,48%                                 | -9,33%                                 |
| 13 | AS65 | -2,532617           | -228,59%                              | -182,89%                               | -282,84%                               | -167,56%                               | -17,08%                                |
| 14 | AS66 | 14,491525           | 41,15%                                | 51,65%                                 | 30,84%                                 | 43,67%                                 | 29,26%                                 |
| 15 | AS68 | 25,916667           | -41,20%                               | -21,82%                                | -2,29%                                 | 2,26%                                  | 3,36%                                  |
|    |      | (min)               | -228,59%                              | -182,89%                               | -282,84%                               | -167,56%                               | -52,99%                                |
|    |      | (mean neg. dev.)    | -82,15%                               | -49,50%                                | -50,84%                                | -33,61%                                | -21,25%                                |
|    |      | (mean pos. dev.)    | 71,79%                                | 93,09%                                 | 34,97%                                 | 22,94%                                 | 30,20%                                 |
|    |      | (max)               | 184,94%                               | 301,22%                                | 91,25%                                 | 55,76%                                 | 71,46%                                 |

|                                | 1 term model           | 2 terms model                        | 3 terms model                                       | 4 terms model                                                   | 5 terms model                                                                 |                                                                            |
|--------------------------------|------------------------|--------------------------------------|-----------------------------------------------------|-----------------------------------------------------------------|-------------------------------------------------------------------------------|----------------------------------------------------------------------------|
| df                             | 3                      | 4                                    | 5                                                   | 6                                                               | 7                                                                             |                                                                            |
| AICc                           | 114,7                  | 103,9                                | 100,3                                               | 101,2                                                           | 105,9                                                                         |                                                                            |
| $\sigma$                       | 9,0643                 | 5,7871                               | 4,5898                                              | 4,0784                                                          | 3,9209                                                                        |                                                                            |
| adjusted R <sup>2</sup>        | 0,2956                 | 0,7129                               | 0,8194                                              | 0,8574                                                          | 0,8682                                                                        |                                                                            |
| Predictor variables            | Symbio-bacterium       | Megasphaera Symbio-bacterium         | Marvinbryantia Megasphaera Symbio-bacterium         | Blautia Marvinbryantia Megasphaera Symbio-bacterium             | Blautia Marvinbryantia Megasphaera Oscillibacter Symbio-bacterium             |                                                                            |
| Indices of predictor variables | 70                     | 43<br>70                             | 58<br>43<br>70                                      | 12<br>58<br>43<br>70                                            | 12<br>58<br>43<br>17<br>70                                                    |                                                                            |
| Terms (estimates)              | -2,5650<br>113260,7034 | 1,7245<br>-34920,8953<br>151036,5041 | 3,3265<br>-29073,0909<br>-32417,6487<br>197333,5067 | 3,6686<br>685,5863<br>-42446,7954<br>-57021,0251<br>208553,4721 | 4,8010<br>874,0117<br>-40465,5047<br>-62898,6129<br>-4367,8173<br>297822,5306 | $\beta_0$<br>$\beta_1$<br>$\beta_2$<br>$\beta_3$<br>$\beta_4$<br>$\beta_5$ |



Supplementary Table S6B

Predicted weight loss, calculated as RWL, including classification and relative as well as absolute deviations of the predicted weight loss to the observed weight loss. Values are calculated for each patient under the optimal linear regression models with one to five linear terms containing predictor variables from the final set of selected species of Table 6. Predictions for patients, numbered from 1 – 15 were classified as “correct(+)” in case significant weight loss occurred and was predicted, as “correct(-)” in case significant weight loss did not occur and was predicted as not occurring, as “overpredicted” in case a model predicted significant weight loss but it did not occur, and as “underpredicted” in case a model predicted no significant weight loss but significant weight loss occurred. The threshold for a significant weight loss was chosen as 10 in case of RWL.

Absolute deviations are the differences between predicted and RWL.

Relative deviations are absolute deviations divided by RWL.

| DS | ID      | Experimental RWL | Predicted RWL<br>1 term model | Predicted RWL<br>2 terms model | Predicted RWL<br>3 terms model | Predicted RWL<br>4 terms model | Predicted RWL<br>5 terms model |
|----|---------|------------------|-------------------------------|--------------------------------|--------------------------------|--------------------------------|--------------------------------|
|    | 1 AS44  | 7,419621         | 3,358021                      | 1,735744                       | 4,311619                       | 7,119686                       | 5,287959                       |
|    | 2 AS45  | -10,017575       | 5,191555                      | -10,778968                     | -11,080497                     | -10,132400                     | -9,928366                      |
|    | 3 AS50  | 14,672897        | 5,987070                      | 8,224208                       | 11,608545                      | 13,733050                      | 12,801215                      |
|    | 4 AS51  | 1,790831         | 4,076365                      | 4,830757                       | 5,951041                       | 0,993021                       | 0,897392                       |
|    | 5 AS53  | -10,819672       | 2,868688                      | 3,230826                       | -9,398169                      | -8,462374                      | -8,706831                      |
|    | 6 AS56  | 17,835821        | 14,004983                     | 18,752444                      | 20,465023                      | 21,776791                      | 20,751212                      |
|    | 7 AS58  | 8,203593         | 4,358105                      | 6,193967                       | 7,386489                       | 10,019700                      | 9,686376                       |
|    | 8 AS60  | 20,636285        | 18,664190                     | 25,038256                      | 17,629033                      | 17,261237                      | 17,162297                      |
|    | 9 AS61  | 15,848671        | 12,401734                     | 13,445355                      | 14,488254                      | 16,046995                      | 17,370635                      |
|    | 10 AS62 | 17,401961        | 9,680260                      | 10,868653                      | 12,610704                      | 14,350831                      | 16,041907                      |
|    | 11 AS63 | 7,463672         | 22,205780                     | 8,136136                       | 8,126581                       | 7,390345                       | 7,203286                       |
|    | 12 AS64 | 12,247475        | 8,961612                      | 12,357860                      | 13,601029                      | 8,753592                       | 8,761065                       |
|    | 13 AS65 | -2,532617        | 5,653377                      | 5,973593                       | 7,589467                       | 0,722263                       | 0,860035                       |
|    | 14 AS66 | 14,491525        | 4,551628                      | 7,522363                       | 9,246657                       | 12,036983                      | 13,874751                      |
|    | 15 AS68 | 25,916667        | 18,595809                     | 25,027688                      | 28,024077                      | 28,948802                      | 28,496656                      |

| DS | ID      | Experimental RWL | Classification RWL<br>1 term model | Classification RWL<br>2 terms model | Classification RWL<br>3 terms model | Classification RWL<br>4 terms model | Classification RWL<br>5 terms model |
|----|---------|------------------|------------------------------------|-------------------------------------|-------------------------------------|-------------------------------------|-------------------------------------|
|    | 1 AS44  | 7,419621         | correct(-)                         | correct(-)                          | correct(-)                          | correct(-)                          | correct(-)                          |
|    | 2 AS45  | -10,017575       | correct(-)                         | correct(-)                          | correct(-)                          | correct(-)                          | correct(-)                          |
|    | 3 AS50  | 14,672897        | underpredicted                     | underpredicted                      | correct(+)                          | correct(+)                          | correct(+)                          |
|    | 4 AS51  | 1,790831         | correct(-)                         | correct(-)                          | correct(-)                          | correct(-)                          | correct(-)                          |
|    | 5 AS53  | -10,819672       | correct(-)                         | correct(-)                          | correct(-)                          | correct(-)                          | correct(-)                          |
|    | 6 AS56  | 17,835821        | correct(+)                         | correct(+)                          | correct(+)                          | correct(+)                          | correct(+)                          |
|    | 7 AS58  | 8,203593         | correct(-)                         | correct(-)                          | correct(-)                          | overpredicted                       | correct(-)                          |
|    | 8 AS60  | 20,636285        | correct(+)                         | correct(+)                          | correct(+)                          | correct(+)                          | correct(+)                          |
|    | 9 AS61  | 15,848671        | correct(+)                         | correct(+)                          | correct(+)                          | correct(+)                          | correct(+)                          |
|    | 10 AS62 | 17,401961        | underpredicted                     | correct(+)                          | correct(+)                          | correct(+)                          | correct(+)                          |
|    | 11 AS63 | 7,463672         | overpredicted                      | correct(-)                          | correct(-)                          | correct(-)                          | correct(-)                          |
|    | 12 AS64 | 12,247475        | underpredicted                     | correct(+)                          | correct(+)                          | underpredicted                      | underpredicted                      |
|    | 13 AS65 | -2,532617        | correct(-)                         | correct(-)                          | correct(-)                          | correct(-)                          | correct(-)                          |
|    | 14 AS66 | 14,491525        | underpredicted                     | underpredicted                      | underpredicted                      | correct(+)                          | correct(+)                          |
|    | 15 AS68 | 25,916667        | correct(+)                         | correct(+)                          | correct(+)                          | correct(+)                          | correct(+)                          |
|    |         | correct(+)       | 4                                  | 6                                   | 7                                   | 7                                   | 7                                   |
|    |         | correct(-)       | 6                                  | 7                                   | 7                                   | 6                                   | 7                                   |
|    |         | underpredicted   | 4                                  | 2                                   | 1                                   | 1                                   | 1                                   |
|    |         | overpredicted    | 1                                  | 0                                   | 0                                   | 1                                   | 0                                   |
|    |         | sum correct      | 10                                 | 13                                  | 14                                  | 13                                  | 14                                  |
|    |         | sum incorrect    | 5                                  | 2                                   | 1                                   | 2                                   | 1                                   |

| DS | ID      | Experimental RWL | Abs. deviation RWL<br>1 term model | Abs. deviation RWL<br>2 terms model | Abs. deviation RWL<br>3 terms model | Abs. deviation RWL<br>4 terms model | Abs. deviation RWL<br>5 terms model |
|----|---------|------------------|------------------------------------|-------------------------------------|-------------------------------------|-------------------------------------|-------------------------------------|
|    | 1 AS44  | 7,419621         | -4,0616                            | -5,6839                             | -3,1080                             | -0,2999                             | -2,1317                             |
|    | 2 AS45  | -10,017575       | 15,2091                            | -0,7614                             | -1,0629                             | -0,1148                             | 0,0892                              |
|    | 3 AS50  | 14,672897        | -8,6858                            | -6,4487                             | -3,0644                             | -0,9398                             | -1,8717                             |
|    | 4 AS51  | 1,790831         | 2,2855                             | 3,0399                              | 4,1602                              | -0,7978                             | -0,8934                             |
|    | 5 AS53  | -10,819672       | 13,6884                            | 14,0505                             | 1,4215                              | 2,3573                              | 2,1128                              |
|    | 6 AS56  | 17,835821        | -3,8308                            | 0,9166                              | 2,6292                              | 3,9410                              | 2,9154                              |
|    | 7 AS58  | 8,203593         | -3,8455                            | -2,0096                             | -0,8171                             | 1,8161                              | 1,4828                              |
|    | 8 AS60  | 20,636285        | -1,9721                            | 4,4020                              | -3,0073                             | -3,3750                             | -3,4740                             |
|    | 9 AS61  | 15,848671        | -3,4469                            | -2,4033                             | -1,3604                             | 0,1983                              | 1,5220                              |
|    | 10 AS62 | 17,401961        | -7,7217                            | -6,5333                             | -4,7913                             | -3,0511                             | -1,3601                             |
|    | 11 AS63 | 7,463672         | 14,7421                            | 0,6725                              | 0,6629                              | -0,0733                             | -0,2604                             |
|    | 12 AS64 | 12,247475        | -3,2859                            | 0,1104                              | 1,3536                              | -3,4939                             | -3,4864                             |
|    | 13 AS65 | -2,532617        | 8,1860                             | 8,5062                              | 10,1221                             | 3,2549                              | 3,3927                              |

Supplementary Table S6B (continued)

|    |      |                  |         |         |         |         |         |
|----|------|------------------|---------|---------|---------|---------|---------|
| 14 | AS66 | 14,491525        | -9,9399 | -6,9692 | -5,2449 | -2,4545 | -0,6168 |
| 15 | AS68 | 25,916667        | -7,3209 | -0,8890 | 2,1074  | 3,0321  | 2,5800  |
|    |      | (min)            | -9,9399 | -6,9692 | -5,2449 | -3,4939 | -3,4864 |
|    |      | (mean neg. dev.) | -5,4111 | -3,9623 | -2,8070 | -1,6223 | -1,7618 |
|    |      | (mean pos. dev.) | 10,8222 | 4,5283  | 3,2081  | 2,4333  | 2,0135  |
|    |      | (max)            | 15,2091 | 14,0505 | 10,1221 | 3,9410  | 3,3927  |

| DS | ID   | Experimental<br>RWL | Rel. deviation<br>RWL<br>1 term model | Rel. deviation<br>RWL<br>2 terms model | Rel. deviation<br>RWL<br>3 terms model | Rel. deviation<br>RWL<br>4 terms model | Rel. deviation<br>RWL<br>5 terms model |
|----|------|---------------------|---------------------------------------|----------------------------------------|----------------------------------------|----------------------------------------|----------------------------------------|
| 1  | AS44 | 7,419621            | -54,74%                               | -76,61%                                | -41,89%                                | -4,04%                                 | -28,73%                                |
| 2  | AS45 | -10,017575          | -151,82%                              | 7,60%                                  | 10,61%                                 | 1,15%                                  | -0,89%                                 |
| 3  | AS50 | 14,672897           | -59,20%                               | -43,95%                                | -20,88%                                | -6,41%                                 | -12,76%                                |
| 4  | AS51 | 1,790831            | 127,62%                               | 169,75%                                | 232,31%                                | -44,55%                                | -49,89%                                |
| 5  | AS53 | -10,819672          | -126,51%                              | -129,86%                               | -13,14%                                | -21,79%                                | -19,53%                                |
| 6  | AS56 | 17,835821           | -21,48%                               | 5,14%                                  | 14,74%                                 | 22,10%                                 | 16,35%                                 |
| 7  | AS58 | 8,203593            | -46,88%                               | -24,50%                                | -9,96%                                 | 22,14%                                 | 18,07%                                 |
| 8  | AS60 | 20,636285           | -9,56%                                | 21,33%                                 | -14,57%                                | -16,35%                                | -16,83%                                |
| 9  | AS61 | 15,848671           | -21,75%                               | -15,16%                                | -8,58%                                 | 1,25%                                  | 9,60%                                  |
| 10 | AS62 | 17,401961           | -44,37%                               | -37,54%                                | -27,53%                                | -17,53%                                | -7,82%                                 |
| 11 | AS63 | 7,463672            | 197,52%                               | 9,01%                                  | 8,88%                                  | -0,98%                                 | -3,49%                                 |
| 12 | AS64 | 12,247475           | -26,83%                               | 0,90%                                  | 11,05%                                 | -28,53%                                | -28,47%                                |
| 13 | AS65 | -2,532617           | -323,22%                              | -335,87%                               | -399,67%                               | -128,52%                               | -133,96%                               |
| 14 | AS66 | 14,491525           | -68,59%                               | -48,09%                                | -36,19%                                | -16,94%                                | -4,26%                                 |
| 15 | AS68 | 25,916667           | -28,25%                               | -3,43%                                 | 8,13%                                  | 11,70%                                 | 9,95%                                  |
|    |      | (min)               | -323,22%                              | -335,87%                               | -399,67%                               | -128,52%                               | -133,96%                               |
|    |      | (mean neg. dev.)    | -75,63%                               | -79,45%                                | -63,60%                                | -28,56%                                | -27,87%                                |
|    |      | (mean pos. dev.)    | 162,57%                               | 35,62%                                 | 47,62%                                 | 11,67%                                 | 13,49%                                 |
|    |      | (max)               | 197,52%                               | 169,75%                                | 232,31%                                | 22,14%                                 | 18,07%                                 |

|                                      | 1 term model            | 2 terms model                                    | 3 terms model                                                                 | 4 terms model                                                                                             | 5 terms model                                                                                                                         |                                                                            |
|--------------------------------------|-------------------------|--------------------------------------------------|-------------------------------------------------------------------------------|-----------------------------------------------------------------------------------------------------------|---------------------------------------------------------------------------------------------------------------------------------------|----------------------------------------------------------------------------|
| df                                   | 3                       | 4                                                | 5                                                                             | 6                                                                                                         | 7                                                                                                                                     |                                                                            |
| AICc                                 | 114,7                   | 106,4                                            | 99,4                                                                          | 91                                                                                                        | 95,9                                                                                                                                  |                                                                            |
| $\sigma$                             | 9,0649                  | 6,2983                                           | 4,4478                                                                        | 2,9069                                                                                                    | 2,8091                                                                                                                                |                                                                            |
| adjusted R <sup>2</sup>              | 0,2955                  | 0,6599                                           | 0,8304                                                                        | 0,9273                                                                                                    | 0,9323                                                                                                                                |                                                                            |
| Predictor<br>variables               | Alistipes<br>finegoldii | Alistipes<br>finegoldii<br>Bacteroides<br>caccae | Alistipes<br>finegoldii<br>Bacteroides<br>caccae<br>Roseburia<br>intestinalis | Alistipes<br>finegoldii<br>Bacteroides<br>caccae<br>Bacteroides<br>stercoris<br>Roseburia<br>intestinalis | Alistipes<br>finegoldii<br>Bacteroides<br>caccae<br>Bacteroides<br>stercoris<br>Ethanolog.<br>harbinense<br>Roseburia<br>intestinalis |                                                                            |
| Indices of<br>predictor<br>variables | 8                       | 8<br>59                                          | 8<br>59<br>12                                                                 | 8<br>59<br>40<br>12                                                                                       | 8<br>59<br>40<br>89<br>12                                                                                                             |                                                                            |
| Terms<br>(estimates)                 | 1,3661<br>422,1726      | 4,7029<br>516,2542<br>-2437,8965                 | 8,6615<br>520,5949<br>-2878,3336<br>-134,7868                                 | 12,2728<br>461,9901<br>-2980,6231<br>-548,4907<br>-146,5595                                               | 9,8820<br>445,1752<br>-2863,9291<br>-462,5387<br>3366,6821<br>-135,9567                                                               | $\beta_0$<br>$\beta_1$<br>$\beta_2$<br>$\beta_3$<br>$\beta_4$<br>$\beta_5$ |
